# Supplementary material for: Genomic resistant determinants of multidrug-resistant Campylobacter spp. isolates in Peru
Source: PubMed Central journal article supplement — J Glob Antimicrob Resist. Author manuscript; Available in PMC 2024 May 14. (PMC11092888; doi:10.1016/j.jgar.2024.01.009), 2024-01-24

## **Supplementary Data File 2**

### **Bioinformatic Tools and Data Bases**

- Geneious Prime v. 2022.2.2 (<https://www.geneious.com>)<sup>1,2</sup>
- CheckM v. 1.1.3 software<sup>3</sup>
- Kraken Taxonomic Sequence Classification System<sup>4</sup>
- PubMLST allelic database<sup>5</sup>
- Comprehensive Antibiotic Resistance Database (CARD), ResFinder and PointFinder, and NCBI AMRFinder databases<sup>6-9</sup>
- Roary v. 3.12.0<sup>10</sup>
- MAFFT v. 7.475<sup>11</sup>
- ModelTest-NG v. 0.1.7<sup>12</sup>
- RAxML v. 8.2.12<sup>13</sup>
- iTOL v. 6.6<sup>14</sup>
- Microreact<sup>15</sup>

### **References**

1. Bankevich A, Nurk S, Antipov D, et al. SPAdes: a new genome assembly algorithm and its applications to single-cell sequencing. *J Comput Biol*. May 2012;19(5):455-77. doi:10.1089/cmb.2012.0021
2. Kearse M, Moir R, Wilson A, et al. Geneious Basic: an integrated and extendable desktop software platform for the organization and analysis of sequence data. *Bioinformatics*. Jun 15 2012;28(12):1647-9. doi:10.1093/bioinformatics/bts199
3. Parks DH, Imelfort M, Skennerton CT, Hugenholtz P, Tyson GW. CheckM: assessing the quality of microbial genomes recovered from isolates, single cells, and metagenomes. *Genome Research*. 2015;25(7):1043-1055. doi:10.1101/gr.186072.114
4. Wood DE, Salzberg SL. Kraken: ultrafast metagenomic sequence classification using exact alignments. *Genome Biology*. 2014;15(3):R46. doi:10.1186/gb-2014-15-3-r46
5. Cody AJ, Bray JE, Jolley KA, McCarthy ND, Maiden MCJ. Core Genome Multilocus Sequence Typing Scheme for Stable, Comparative Analyses of *Campylobacter jejuni* and *C. coli* Human Disease Isolates. *Journal of clinical microbiology*. 2017;55(7):2086-2097. doi:10.1128/JCM.00080-17
6. Alcock BP, Raphenya AR, Lau TTY, et al. CARD 2020: antibiotic resistome surveillance with the comprehensive antibiotic resistance database. *Nucleic Acids Res*. Jan 8 2020;48(D1):D517-D525. doi:10.1093/nar/gkz935
7. Zankari E, Allesøe R, Joensen KG, Cavaco LM, Lund O, Aarestrup FM. PointFinder: a novel web tool for WGS-based detection of antimicrobial resistance associated with chromosomal point mutations in bacterial pathogens. *J Antimicrob Chemother*. 2017;72(10):2764-2768. doi:10.1093/jac/dkx217
8. Bortolaia V, Kaas RS, Ruppe E, et al. ResFinder 4.0 for predictions of phenotypes from genotypes. *J Antimicrob Chemother*. 2020;75(12):3491-3500. doi:10.1093/jac/dkaa345
9. Feldgarden M, Brover V, Haft DH, et al. Validating the AMRFinder Tool and Resistance Gene Database by Using Antimicrobial Resistance Genotype-Phenotype Correlations in a Collection of Isolates. *Antimicrob Agents Chemother*. Nov 2019;63(11)doi:10.1128/AAC.00483-19
10. Page AJ, Cummins CA, Hunt M, et al. Roary: rapid large-scale prokaryote pan genome analysis. *Bioinformatics*. Nov 15 2015;31(22):3691-3. doi:10.1093/bioinformatics/btv421

11. Katoh K, Misawa K, Kuma K, Miyata T. MAFFT: a novel method for rapid multiple sequence alignment based on fast Fourier transform. *Nucleic Acids Res.* Jul 15 2002;30(14):3059-66. doi:10.1093/nar/gkf436
12. Darriba D, Posada D, Kozlov AM, Stamatakis A, Morel B, Flouri T. ModelTest-NG: A New and Scalable Tool for the Selection of DNA and Protein Evolutionary Models. *Mol Biol Evol.* Jan 1 2020;37(1):291-294. doi:10.1093/molbev/msz189
13. Stamatakis A. RAxML version 8: a tool for phylogenetic analysis and post-analysis of large phylogenies. *Bioinformatics.* May 1 2014;30(9):1312-3. doi:10.1093/bioinformatics/btu033
14. Letunic I, Bork P. Interactive Tree Of Life (iTOL) v5: an online tool for phylogenetic tree display and annotation. *Nucleic Acids Res.* Jul 2 2021;49(W1):W293-W296. doi:10.1093/nar/gkab301
15. Argimon S, Abudahab K, Goater RJE, et al. Microreact: visualizing and sharing data for genomic epidemiology and phylogeography. *Microb Genom.* Nov 2016;2(11):e000093. doi:10.1099/mgen.0.000093

**Supplementary Table 1.** *Campylobacter jejuni* and *Campylobacter coli* Quality Control Metrics of Genomes, Sequence Types, Clonal Complexes and MLST alleles

| Sample ID | Pubmed ID | Specie           | Completeness | Contamination | Heterogeneity | Contigs | Total_Length | N50     | MLST    | CC     | aspA | glnA | gltA | glyA | pgm  | tkf | uncA | Sample Date | Sample Type  | LOS  |
|-----------|-----------|------------------|--------------|---------------|---------------|---------|--------------|---------|---------|--------|------|------|------|------|------|-----|------|-------------|--------------|------|
| CAM000279 | 112378    | <i>C. jejuni</i> | 99.59%       | 0.20%         | 0.00%         | 28      | 1,707,988    | 149,981 | ST11958 | ST-353 | 7    | 17   | 5    | 10   | 640  | 177 | 6    | 15-Oct-21   | Diarrheal    | EHOP |
| CAM000391 | 112380    | <i>C. jejuni</i> | 99.59%       | 0.15%         | 0.00%         | 26      | 1,725,361    | 246,065 | ST1036  | ST-353 | 7    | 84   | 5    | 10   | 11   | 3   | 6    | 8-Nov-21    | Asymptomatic | B    |
| CAM000396 | 112381    | <i>C. jejuni</i> | 99.50%       | 0.11%         | 0.00%         | 22      | 1,677,563    | 316,916 | ST10237 | ST-354 | 8    | 17   | 2    | 2    | 11   | 3   | 6    | 9-Nov-21    | Diarrheal    | K    |
| CAM000518 | 112383    | <i>C. jejuni</i> | 99.57%       | 0.11%         | 0.00%         | 24      | 1,684,499    | 176,535 | ST1233  | ST-353 | 7    | 17   | 5    | 10   | 10   | 177 | 6    | 7-Dec-21    | Diarrheal    | EHOP |
| CAM000524 | 112384    | <i>C. jejuni</i> | 99.57%       | 0.11%         | 0.00%         | 17      | 1,624,673    | 184,843 | ST6091  |        | 2    | 4    | 5    | 25   | 11   | 203 | 5    | 9-Dec-21    | Diarrheal    | C    |
| CAM000702 | 112389    | <i>C. jejuni</i> | 99.56%       | 1.49%         | 58.33%        | 107     | 1,786,229    | 32,143  | ST11962 | ST-206 | 2    | 25   | 5    | 10   | 2    | 881 | 5    | 3-Jan-22    | Asymptomatic | B    |
| CAM000717 | 112391    | <i>C. jejuni</i> | 99.57%       | 0.15%         | 0.00%         | 49      | 1,795,059    | 137,382 | ST11962 | ST-206 | 2    | 25   | 5    | 10   | 2    | 881 | 5    | 4-Jan-22    | Diarrheal    | B    |
| CAM000766 | 112393    | <i>C. jejuni</i> | 99.50%       | 0.15%         | 0.00%         | 39      | 1,809,412    | 175,297 | ST607   | ST-607 | 8    | 2    | 5    | 53   | 11   | 3   | 1    | 7-Jan-22    | Diarrheal    | EHOP |
| CAM000833 | 112395    | <i>C. jejuni</i> | 99.53%       | 0.39%         | 40.00%        | 49      | 1,738,620    | 191,744 | ST11964 | ST-354 | 8    | 821  | 2    | 2    | 11   | 345 | 6    | 13-Jan-22   | Asymptomatic | DF   |
| CAM000854 | 112396    | <i>C. jejuni</i> | 99.53%       | 0.29%         | 33.30%        | 58      | 1,744,032    | 179,892 | ST11964 | ST-354 | 8    | 821  | 2    | 2    | 11   | 345 | 6    | 17-Jan-22   | Diarrheal    | DF   |
| CAM001070 | 112399    | <i>C. jejuni</i> | 99.57%       | 0.23%         | 50.00%        | 25      | 1,619,773    | 289,314 | ST49    | ST-49  | 3    | 1    | 5    | 17   | 11   | 11  | 6    | 9-Feb-22    | Diarrheal    | IJ   |
| CAM001075 | 112400    | <i>C. jejuni</i> | 99.38%       | 0.15%         | 0.00%         | 15      | 1,636,594    | 175,800 | ST10315 | ST-353 | 7    | 84   | 5    | 2    | 11   | 3   | 6    | 10-Feb-22   | Asymptomatic | C    |
| CAM001220 | 112403    | <i>C. jejuni</i> | 99.57%       | 0.74%         | 0.00%         | 38      | 1,711,393    | 179,702 | ST460   | ST-460 | 24   | 30   | 2    | 2    | 89   | 59  | 6    | 28-Feb-22   | Diarrheal    | B    |
| CAM001243 | 112404    | <i>C. jejuni</i> | 99.50%       | 1.58%         | 0.00%         | 155     | 1,841,837    | 176,683 | ST607   | ST-607 | 8    | 2    | 5    | 53   | 11   | 3   | 1    | 2-Mar-22    | Asymptomatic | B    |
| CAM001343 | 115882    | <i>C. jejuni</i> | 99.85%       | 0.15%         | 0.00%         | 25      | 1,638,909    | 151,386 | ST660   | ST-22  | 1    | 3    | 6    | 4    | 54   | 91  | 3    | 22-Mar-22   | Diarrheal    | A    |
| CAM001343 | 115980    | <i>C. jejuni</i> | 99.85        | 0.15%         | 0.00%         | 32      | 1,639,396    | 151,386 | ST660   | ST-22  | 1    | 3    | 6    | 4    | 54   | 91  | 3    | 10-Mar-22   | Diarrheal    | A    |
| CAM001368 | 113206    | <i>C. jejuni</i> | 98.92%       | 0.26%         | 33.33%        | 54      | 1,779,656    | 183,968 |         | ST-607 |      | 2    | 786  | 53   | 11   | 3   | 1    | 14-Mar-22   | Diarrheal    | EHOP |
| CAM001518 | 113213    | <i>C. jejuni</i> | 99.50%       | 0.18%         | 0.00%         | 47      | 1,772,674    | 168,878 | ST607   | ST-607 | 8    | 2    | 5    | 53   | 11   | 3   | 1    | 19-Mar-22   | Asymptomatic | B    |
| CAM001568 | 113215    | <i>C. jejuni</i> | 99.85%       | 0.15%         | 0.00%         | 51      | 1,724,809    | 102,188 | ST1036  | ST-353 | 7    | 84   | 5    | 10   | 11   | 3   | 6    | 28-Mar-22   | Diarrheal    | B    |
| CAM001643 | 113219    | <i>C. jejuni</i> | 99.57%       | 0.23%         | 50.00%        | 35      | 1,712,338    | 175,518 | ST460   | ST-460 | 24   | 30   | 2    | 2    | 89   | 59  | 6    | 5-Apr-22    | Diarrheal    | B    |
| CAM001900 | 113224    | <i>C. jejuni</i> | 99.57%       | 0.58%         | 50.00%        | 56      | 1,679,651    | 135,010 | ST10311 |        | 2    | 4    | 5    | 25   | 1057 | 203 | 5    | 4-May-22    | Diarrheal    | C    |
| CAM001983 | 115984    | <i>C. jejuni</i> | 99.39%       | 1.03%         | 0.00%         | 82      | 1,675,950    | 79,535  | ST6091  |        | 2    | 4    | 5    | 25   | 11   | 203 | 5    | 13-May-22   | Diarrheal    | C    |
| CAM002007 | 115986    | <i>C. jejuni</i> | 99.50%       | 0.21%         | 0.00%         | 62      | 1,804,564    | 175,174 | ST12396 |        | 7    | 2    | 5    | 53   | 10   | 3   | 1    | 16-May-22   | Diarrheal    | EHOP |
| CAM002070 | 115989    | <i>C. jejuni</i> | 99.57%       | 0.11%         | 0.00%         | 29      | 1,660,147    | 184,842 | ST6091  |        | 2    | 4    | 5    | 25   | 11   | 203 | 5    | 18-May-22   | Diarrheal    | C    |
| CAM002255 | 115991    | <i>C. jejuni</i> | 99.50%       | 0.26%         | 0.00%         | 52      | 1,789,948    | 183,885 | ST12398 |        | 7    | 2    | 5    | 53   | 11   | 177 | 6    | 31-May-22   | Diarrheal    | B    |
| CAM002378 | 115992    | <i>C. jejuni</i> | 99.50%       | 0.24%         | 0.00%         | 57      | 1,779,628    | 139,758 | ST607   | ST-607 | 8    | 2    | 5    | 53   | 11   | 3   | 1    | 8-Jun-22    | Diarrheal    | EHOP |
| CAM002400 | 115993    | <i>C. jejuni</i> | 99.57%       | 0.15%         | 0.00%         | 32      | 1,720,365    | 142,367 | ST12399 |        | 2    | 25   | 5    | 10   | 11   | 881 | 5    | 10-Jun-22   | Diarrheal    | B    |
| CAM002438 | 115994    | <i>C. jejuni</i> | 99.57%       | 0.15%         | 0.00%         | 24      | 1,720,725    | 150,421 | ST12399 |        | 2    | 25   | 5    | 10   | 11   | 881 | 5    | 14-Jun-22   | Diarrheal    | B    |
| CAM002558 | 115995    | <i>C. jejuni</i> | 99.59%       | 0.20%         | 0.00%         | 29      | 1,712,554    | 179,026 | ST11958 | ST-353 | 7    | 17   | 5    | 10   | 640  | 177 | 6    | 20-Jun-22   | Diarrheal    | EHOP |
| CAM002564 | 115996    | <i>C. jejuni</i> | 99.57%       | 0.15%         | 0.00%         | 31      | 1,718,598    | 150,282 | ST12399 |        | 2    | 25   | 5    | 10   | 11   | 881 | 5    | 20-Jun-22   | Diarrheal    | B    |
| CAM002670 | 115997    | <i>C. jejuni</i> | 99.59%       | 0.20%         | 0.00%         | 38      | 1,709,693    | 149,976 | ST11958 | ST-353 | 7    | 17   | 5    | 10   | 640  | 177 | 6    | 30-Jun-22   | Asymptomatic | EHOP |
| CAM002685 | 115998    | <i>C. jejuni</i> | 99.59%       | 0.20%         | 0.00%         | 26      | 1,711,434    | 176,648 | ST11958 | ST-353 | 7    | 17   | 5    | 10   | 640  | 177 | 6    | 1-Jul-22    | Asymptomatic | EHOP |
| CAM002887 | 116000    | <i>C. jejuni</i> | 99.50%       | 0.18%         | 0.00%         | 46      | 1,776,081    | 183,970 | ST12402 |        | 8    | 336  | 5    | 53   | 11   | 3   | 1    | 15-Jul-22   | Asymptomatic | DF   |
| CAM002934 | 116001    | <i>C. jejuni</i> | 99.59%       | 0.19%         | 0.00%         | 36      | 1,717,323    | 156,282 | ST1036  | ST-353 | 7    | 84   | 5    | 10   | 11   | 3   | 6    | 19-Jul-22   | Asymptomatic | B    |
| CAM002957 | 116002    | <i>C. jejuni</i> | 99.59%       | 0.19%         | 0.00%         | 31      | 1,717,147    | 118,476 | ST1036  | ST-353 | 7    | 84   | 5    | 10   | 11   | 3   | 6    | 22-Jul-22   | Asymptomatic | B    |
| CAM003004 | 116003    | <i>C. jejuni</i> | 99.57%       | 0.11%         | 0.00%         | 29      | 1,702,227    | 290,997 | ST1233  | ST-353 | 7    | 17   | 5    | 10   | 10   | 177 | 6    | 26-Jul-22   | Diarrheal    | EHOP |
| CAM003047 | 116004    | <i>C. jejuni</i> | 99.53%       | 0.15%         | 0.00%         | 48      | 1,699,360    | 240,627 | ST3852  | ST-354 | 8    | 2    | 2    | 2    | 11   | 345 | 6    | 1-Aug-22    | Diarrheal    | DF   |
| CAM003063 | 116005    | <i>C. jejuni</i> | 99.59%       | 0.19%         | 0.00%         | 30      | 1,715,007    | 156,505 | ST1036  | ST-353 | 7    | 84   | 5    | 10   | 11   | 3   | 6    | 2-Aug-22    | Asymptomatic | B    |
| CAM003070 | 116006    | <i>C. jejuni</i> | 99.50%       | 0.11%         | 0.00%         | 35      | 1,670,539    | 164,381 | ST10237 | ST-354 | 8    | 17   | 2    | 2    | 11   | 3   | 6    | 2-Aug-22    | Diarrheal    | B    |
| CAM003118 | 116007    | <i>C. jejuni</i> | 99.57%       | 0.18%         | 0.00%         | 28      | 1,685,713    | 182,498 | ST10241 |        | 2    | 2    | 2    | 2    | 11   | 5   | 237  | 5-Aug-22    | Diarrheal    | B    |
| PE1000386 | 111287    | <i>C. jejuni</i> | 99.94%       | 0.48%         | 0.00%         | 66      | 1,741,344    | 88,855  | ST11580 | ST-21  | 2    | 1    | 5    | 10   | 2    | 881 | 5    | 12-Jun-10   | Asymptomatic | B    |
| PE1000388 | 111288    | <i>C. jejuni</i> | 99.96%       | 0.06%         | 0.00%         | 71      | 1,699,373    | 79,147  | ST11580 | ST-21  | 2    | 1    | 5    | 10   | 2    | 881 | 5    | 14-Jun-10   | Asymptomatic | B    |
| PE1000656 | 115884    | <i>C. jejuni</i> | 98.91%       | 0.32%         | 60.00%        | 213     | 1,612,281    | 15,409  | ST2042  |        | 2    | 2    | 42   | 4    | 90   | 25  | 8    | 4-Aug-10    | Asymptomatic | G    |
| PE1002074 | 115885    | <i>C. jejuni</i> | 99.50%       | 1.42%         | 60.00%        | 171     | 1,743,905    | 49,284  | ST1723  | ST-354 | 8    | 17   | 2    | 2    | 11   | 12  | 6    | 1-Feb-11    | Asymptomatic | K    |
| PE1002325 | 111289    | <i>C. jejuni</i> | 99.77%       | 0.00%         | 0.00%         | 36      | 1,651,166    | 100,142 | ST2802  |        | 7    | 4    | 5    | 25   | 11   | 3   | 5    | 25-Feb-11   | Asymptomatic | C    |
| PE1002384 | 115886    | <i>C. jejuni</i> | 99.52%       | 1.05%         | 57.14%        | 102     | 1,811,211    | 52,581  | ST8310  | ST-21  | 2    | 1    | 5    | 672  | 11   | 1   | 5    | 1-Mar-11    | Asymptomatic | B    |
| PE1002577 | 115887    | <i>C. jejuni</i> | 99.32%       | 0.45%         | 50.00%        | 249     | 1,649,073    | 14,345  | ST1723  | ST-354 | 8    | 17   | 2    | 2    | 11   | 12  | 6    | 21-Mar-11   | Diarrheal    | K    |
| PE1002933 | 115888    | <i>C. jejuni</i> | 98.86%       | 0.92%         | 28.57%        | 251     | 1,739,782    | 13,858  | ST607   | ST-607 | 8    | 2    | 5    | 53   | 11   | 3   | 1    | 29-Apr-11   | Asymptomatic | B    |

|           |        |                  |         |       |        |     |           |         |         |        |    |     |    |     |      |     |     |           |              |      |
|-----------|--------|------------------|---------|-------|--------|-----|-----------|---------|---------|--------|----|-----|----|-----|------|-----|-----|-----------|--------------|------|
| PE1003343 | 115889 | <i>C. jejuni</i> | 99.46%  | 0.15% | 0.00%  | 77  | 1,738,581 | 63,033  | ST607   | ST-607 | 8  | 2   | 5  | 53  | 11   | 3   | 1   | 6-Jun-11  | Asymptomatic | B    |
| PE1003437 | 115890 | <i>C. jejuni</i> | 98.64%  | 0.85% | 14.29% | 217 | 1,699,454 | 14,447  | ST1723  | ST-354 | 8  | 17  | 2  | 2   | 11   | 12  | 6   | 15-Jun-11 | Asymptomatic | K    |
| PE1003872 | 115891 | <i>C. jejuni</i> | 99.24%  | 0.69% | 0.00%  | 209 | 1,615,608 | 12,763  | ST49    | ST-49  | 3  | 1   | 5  | 17  | 11   | 11  | 6   | 22-Jul-11 | Asymptomatic | DF   |
| PE1004853 | 111290 | <i>C. jejuni</i> | 100.00% | 0.04% | 0.00%  | 34  | 1,731,519 | 188,136 | ST1036  | ST-353 | 7  | 84  | 5  | 10  | 11   | 3   | 6   | 19-Oct-11 | Diarrheal    | B    |
| PE1005128 | 115892 | <i>C. jejuni</i> | 98.83%  | 0.66% | 33.33% | 223 | 1,648,538 | 14,074  | ST354   | ST-354 | 8  | 10  | 2  | 2   | 11   | 12  | 6   | 12-Nov-11 | Asymptomatic | DF   |
| PE1005412 | 115893 | <i>C. jejuni</i> | 99.57%  | 0.11% | 0.00%  | 54  | 1,709,490 | 75,041  | ST353   | ST-353 | 7  | 17  | 5  | 2   | 10   | 3   | 6   | 6-Dec-11  | Asymptomatic | EHOP |
| PE1006126 | 111291 | <i>C. jejuni</i> | 100%    | 0.00% | 0.00%  | 125 | 1,674,356 | 30,189  | ST10249 |        | 4  | 112 | 5  | 62  | 11   | 67  | 6   | 25-Jan-12 | Asymptomatic | DF   |
| PE1006841 | 115894 | <i>C. jejuni</i> | 99.21%  | 0.36% | 50.00% | 261 | 1,707,804 | 12,709  | ST535   | ST-460 | 9  | 30  | 2  | 2   | 89   | 59  | 6   | 12-Mar-12 | Asymptomatic | B    |
| PE1007005 | 115895 | <i>C. jejuni</i> | 98.67%  | 0.29% | 25.00% | 202 | 1,678,033 | 16,869  | ST1233  | ST-353 | 7  | 17  | 5  | 10  | 10   | 177 | 6   | 21-Mar-12 | Asymptomatic | EHOP |
| PE1007060 | 115896 | <i>C. jejuni</i> | 99.19%  | 0.69% | 0.00%  | 280 | 1,612,169 | 10,608  | ST3573  |        | 7  | 172 | 21 | 49  | 125  | 224 | 51  | 24-Mar-12 | Diarrheal    | EHOP |
| PE1007218 | 115897 | <i>C. jejuni</i> | 98.88%  | 0.73% | 33.33% | 205 | 1,641,016 | 15,343  | ST5020  | ST-677 | 10 | 2   | 50 | 62  | 120  | 76  | 52  | 7-Apr-12  | Diarrheal    | EHOP |
| PE1007358 | 115898 | <i>C. jejuni</i> | 99.60%  | 1.41% | 20.00% | 194 | 1,598,006 | 16,367  | ST469   | ST-42  | 1  | 2   | 3  | 4   | 5    | 9   | 6   | 17-Apr-12 | Asymptomatic | B    |
| PE1007369 | 111292 | <i>C. jejuni</i> | 99.96%  | 0.00% | 0.00%  | 36  | 1,602,918 | 114,459 | ST436   |        | 7  | 21  | 5  | 62  | 4    | 61  | 44  | 17-Apr-12 | Diarrheal    | EHOP |
| PE1007487 | 115899 | <i>C. jejuni</i> | 97.74%  | 0.40% | 16.67% | 295 | 1,772,311 | 12,294  | ST607   | ST-607 | 8  | 2   | 5  | 53  | 11   | 3   | 1   | 24-Apr-12 | Asymptomatic | B    |
| PE1007769 | 115900 | <i>C. jejuni</i> | 97.95%  | 0.48% | 50.00% | 280 | 1,622,004 | 10,630  | ST354   | ST-354 | 8  | 10  | 2  | 2   | 11   | 12  | 6   | 14-May-12 | Asymptomatic | DF   |
| PE1007787 | 115901 | <i>C. jejuni</i> | 99.85%  | 0.27% | 0.00%  | 54  | 1,645,421 | 66,175  | ST22    | ST-22  | 1  | 3   | 6  | 4   | 3    | 3   | 3   | 15-May-12 | Asymptomatic | A    |
| PE1007831 | 115902 | <i>C. jejuni</i> | 98.90%  | 1.11% | 33.33% | 208 | 1,679,606 | 12,459  | ST1233  | ST-353 | 7  | 17  | 5  | 10  | 10   | 177 | 6   | 17-May-12 | Asymptomatic | EHOP |
| PE1008050 | 115903 | <i>C. jejuni</i> | 99.09%  | 0.15% | 0.00%  | 254 | 1,661,608 | 11,570  | ST10235 | ST-353 | 7  | 17  | 5  | 10  | 11   | 177 | 6   | 1-Jun-12  | Asymptomatic | EHOP |
| PE1008208 | 115904 | <i>C. jejuni</i> | 99.57%  | 1.66% | 27.78% | 146 | 1,843,998 | 136,588 | ST403   | ST-403 | 10 | 27  | 16 | 19  | 10   | 5   | 7   | 12-Jun-12 | Diarrheal    | B    |
| PE1008411 | 115905 | <i>C. jejuni</i> | 99.57%  | 0.17% | 0.00%  | 31  | 1,600,515 | 131,853 | ST52    | ST-52  | 9  | 25  | 2  | 10  | 22   | 3   | 6   | 27-Jun-12 | Diarrheal    | DF   |
| PE1008979 | 115906 | <i>C. jejuni</i> | 99.29%  | 0.15% | 0.00%  | 116 | 1,682,283 | 41,203  | ST10237 | ST-354 | 8  | 17  | 2  | 2   | 11   | 3   | 6   | 7-Aug-12  | Diarrheal    | K    |
| PE1009014 | 111293 | <i>C. jejuni</i> | 99.92%  | 1.63% | 0.00%  | 167 | 1,792,968 | 22,365  | ST11581 | ST-607 | 8  | 2   | 5  | 53  | 4    | 3   | 1   | 9-Aug-12  | Diarrheal    | B    |
| PE1009047 | 115907 | <i>C. jejuni</i> | 98.00%  | 0.50% | 14.29% | 244 | 1,676,604 | 14,872  | ST10246 | ST-353 | 7  | 17  | 5  | 121 | 11   | 177 | 6   | 11-Aug-12 | Asymptomatic | EHOP |
| PE1009519 | 115908 | <i>C. jejuni</i> | 99.18%  | 0.17% | 0.00%  | 267 | 1,664,306 | 12,256  | ST10235 | ST-353 | 7  | 17  | 5  | 10  | 11   | 177 | 6   | 18-Sep-12 | Asymptomatic | EHOP |
| PE1009555 | 115909 | <i>C. jejuni</i> | 99.12%  | 0.21% | 0.00%  | 214 | 1,655,688 | 16,435  | ST10241 |        | 2  | 2   | 2  | 2   | 11   | 5   | 237 | 19-Sep-12 | Asymptomatic | B    |
| PE1009604 | 115910 | <i>C. jejuni</i> | 98.26%  | 0.11% | 0.00%  | 226 | 1,692,509 | 14,849  | ST10237 | ST-354 | 8  | 17  | 2  | 2   | 11   | 3   | 6   | 22-Sep-12 | Asymptomatic | K    |
| PE1009686 | 111294 | <i>C. jejuni</i> | 100%    | 0.00% | 0.00%  | 82  | 1,684,235 | 46,677  | ST10249 |        | 4  | 112 | 5  | 62  | 11   | 67  | 6   | 29-Sep-12 | Asymptomatic | DF   |
| PE1009993 | 115911 | <i>C. jejuni</i> | 98.84%  | 0.39% | 16.67% | 287 | 1,679,860 | 11,987  | ST10261 | ST-353 | 7  | 84  | 5  | 2   | 2    | 203 | 6   | 22-Oct-12 | Asymptomatic | C    |
| PE1010009 | 115912 | <i>C. jejuni</i> | 99.57%  | 0.11% | 0.00%  | 60  | 1,776,775 | 85,392  | ST403   | ST-403 | 10 | 27  | 16 | 19  | 10   | 5   | 7   | 23-Oct-12 | Asymptomatic | B    |
| PE1010051 | 115913 | <i>C. jejuni</i> | 99.80%  | 0.72% | 0.00%  | 180 | 1,704,278 | 19,709  | ST1035  |        | 7  | 2   | 5  | 10  | 10   | 37  | 1   | 26-Oct-12 | Diarrheal    | B    |
| PE1010492 | 115914 | <i>C. jejuni</i> | 99.38%  | 0.19% | 0.00%  | 134 | 1,746,467 | 32,190  | ST5789  | ST-21  | 2  | 1   | 5  | 400 | 11   | 1   | 5   | 3-Dec-12  | Asymptomatic | B    |
| PE1010503 | 115915 | <i>C. jejuni</i> | 99.13%  | 0.22% | 0.00%  | 155 | 1,688,933 | 23,672  | ST6083  | ST-460 | 24 | 30  | 2  | 2   | 89   | 3   | 6   | 3-Dec-12  | Asymptomatic | B    |
| PE1010600 | 115916 | <i>C. jejuni</i> | 99.23%  | 0.50% | 0.00%  | 101 | 1,664,720 | 37,299  | ST2802  |        | 7  | 4   | 5  | 25  | 11   | 3   | 5   | 12-Dec-12 | Diarrheal    | B    |
| PE1010779 | 115917 | <i>C. jejuni</i> | 99.11%  | 0.21% | 0.00%  | 203 | 1,673,224 | 15,232  | ST2993  | ST-362 | 1  | 2   | 42 | 4   | 11   | 9   | 8   | 27-Dec-12 | Asymptomatic | A    |
| PE1010901 | 115918 | <i>C. jejuni</i> | 99.63%  | 0.89% | 14.29% | 177 | 1,712,661 | 22,422  | ST2993  | ST-362 | 1  | 2   | 42 | 4   | 11   | 9   | 8   | 7-Jan-13  | Diarrheal    | A    |
| PE1010984 | 115919 | <i>C. jejuni</i> | 98.19%  | 0.98% | 33.33% | 200 | 1,637,599 | 14,589  | ST10237 | ST-354 | 8  | 17  | 2  | 2   | 11   | 3   | 6   | 14-Jan-13 | Diarrheal    | K    |
| PE1011169 | 115920 | <i>C. jejuni</i> | 99.80%  | 0.99% | 11.11% | 107 | 1,731,164 | 94,523  | ST2993  | ST-362 | 1  | 2   | 42 | 4   | 11   | 9   | 8   | 30-Jan-13 | Asymptomatic | A    |
| PE1011268 | 115921 | <i>C. jejuni</i> | 99.64%  | 0.67% | 12.50% | 174 | 1,684,011 | 20,613  | ST2993  | ST-362 | 1  | 2   | 42 | 4   | 11   | 9   | 8   | 6-Feb-13  | Asymptomatic | A    |
| PE1011396 | 115922 | <i>C. jejuni</i> | 99.03%  | 0.54% | 20.00% | 144 | 1,637,736 | 22,454  | ST3606  |        | 55 | 21  | 2  | 71  | 11   | 37  | 6   | 19-Feb-13 | Asymptomatic | G    |
| PE1011468 | 115923 | <i>C. jejuni</i> | 98.28%  | 0.43% | 0.00%  | 232 | 1,754,075 | 15,596  | ST1212  | ST-607 | 8  | 2   | 5  | 53  | 11   | 3   | 105 | 25-Feb-13 | Diarrheal    | C    |
| PE1011483 | 112446 | <i>C. jejuni</i> | 99.57%  | 0.97% | 37.50% | 59  | 1,792,486 | 175,424 | ST403   | ST-403 | 10 | 27  | 16 | 19  | 10   | 5   | 7   | 26-Feb-13 | Diarrheal    | B    |
| PE1011539 | 111295 | <i>C. jejuni</i> | 99.88%  | 0.06% | 0.00%  | 67  | 1,648,320 | 40,372  | ST10261 | ST-353 | 7  | 84  | 5  | 2   | 2    | 203 | 6   | 2-Mar-13  | Asymptomatic | C    |
| PE1011695 | 115924 | <i>C. jejuni</i> | 99.69%  | 0.24% | 25.00% | 35  | 1,618,423 | 112,580 | ST10251 | ST-42  | 1  | 2   | 42 | 4   | 11   | 9   | 675 | 16-Mar-13 | Asymptomatic | A    |
| PE1011900 | 115925 | <i>C. jejuni</i> | 99.66%  | 0.23% | 50.00% | 44  | 1,576,536 | 85,417  | ST8941  |        | 1  | 2   | 42 | 450 | 10   | 3   | 59  | 5-Apr-13  | Asymptomatic | A    |
| PE1013701 | 115926 | <i>C. jejuni</i> | 98.77%  | 0.45% | 14.29% | 231 | 1,748,405 | 15,877  | ST607   | ST-607 | 8  | 2   | 5  | 53  | 11   | 3   | 1   | 27-Sep-13 | Asymptomatic | B    |
| PE1014386 | 115927 | <i>C. jejuni</i> | 97.56%  | 0.16% | 0.00%  | 256 | 1,620,563 | 10,886  | ST6091  |        | 2  | 4   | 5  | 25  | 11   | 203 | 5   | 11-Dec-13 | Asymptomatic | C    |
| PE1014586 | 111296 | <i>C. jejuni</i> | 100%    | 0.06% | 0.00%  | 167 | 1,770,427 | 26,661  | ST11583 | ST-607 | 8  | 2   | 5  | 53  | 1150 | 3   | 1   | 1-Jun-14  | Asymptomatic | EHOP |
| PE1016056 | 111297 | <i>C. jejuni</i> | 99.96%  | 0.19% | 0.00%  | 82  | 1,686,576 | 45,101  | ST3630  |        | 9  | 2   | 42 | 4   | 11   | 9   | 253 | 18-Jun-14 | Asymptomatic | G    |
| PE1016428 | 112447 | <i>C. jejuni</i> | 99.2%   | 1.34% | 0.00%  | 293 | 1,756,033 | 10,054  | ST10241 |        | 2  | 2   | 2  | 2   | 11   | 5   | 237 | 28-Jul-14 | Asymptomatic | B    |
| CAM000139 | 112371 | <i>C. coli</i>   | 99.37%  | 0.00% | 0.33%  | 41  | 1,698,052 | 215,702 | ST11957 | ST-828 | 33 | 39  | 30 | 82  | 113  | 897 | 17  | 13-Sep-21 | Diarrheal    | II   |

|           |        |                |        |       |        |     |           |         |         |         |     |     |     |     |      |      |     |           |              |      |
|-----------|--------|----------------|--------|-------|--------|-----|-----------|---------|---------|---------|-----|-----|-----|-----|------|------|-----|-----------|--------------|------|
| CAM000431 | 112382 | <i>C. coli</i> | 99.66% | 0.01% | 0.17%  | 78  | 1,789,453 | 163,209 | ST11959 | ST-1150 | 103 | 110 | 103 | 140 | 764  | 898  | 120 | 20-Nov-21 | Diarrheal    | ?    |
| CAM000646 | 112388 | <i>C. coli</i> | 98.99% | 0.00% | 0.00%  | 26  | 1,765,266 | 128,710 | ST11961 | ST-1150 | 103 | 110 | 103 | 140 | 210  | 899  | 79  | 20-Dec-21 | Asymptomatic | ?    |
| CAM001343 | 115883 | <i>C. coli</i> | 98.86% | 0.20% | 0.00%  | 45  | 1,800,160 | 265,875 | ST1055  | ST-828  | 33  | 39  | 30  | 82  | 104  | 47   | 17  | 22-Mar-22 | Diarrheal    | I    |
| CAM001347 | 113204 | <i>C. coli</i> | 98.86% | 0.20% | 0.00%  | 47  | 1,801,181 | 265,874 | ST1055  | ST-828  | 33  | 39  | 30  | 82  | 104  | 47   | 17  | 10-Mar-22 | Asymptomatic | I    |
| CAM001351 | 113205 | <i>C. coli</i> | 98.86% | 0.20% | 0.00%  | 47  | 1,799,488 | 265,499 | ST1055  | ST-828  | 33  | 39  | 30  | 82  | 104  | 47   | 17  | 11-Mar-22 | Diarrheal    | I    |
| CAM001567 | 113214 | <i>C. coli</i> | 99.27% | 0.84% | 60.00% | 89  | 1,810,130 | 52,783  | ST10266 |         | 247 | 748 | 30  | 82  | 189  | 47   | 17  | 26-Mar-22 | Asymptomatic | II   |
| CAM001627 | 113217 | <i>C. coli</i> | 99.56% | 0.44% | 0.00%  | 22  | 1,767,517 | 150,296 | ST11961 | ST-1150 | 103 | 110 | 103 | 140 | 210  | 899  | 79  | 4-Apr-22  | Asymptomatic | ?    |
| CAM001666 | 115982 | <i>C. coli</i> | 98.86% | 0.20% | 0.00%  | 47  | 1,800,677 | 265,499 | ST1055  | ST-828  | 33  | 39  | 30  | 82  | 104  | 47   | 17  | 7-Apr-22  | Asymptomatic | I    |
| CAM001698 | 113221 | <i>C. coli</i> | 99.35% | 0.34% | 33.33% | 59  | 1,892,673 | 180,115 | ST12285 | ST-828  | 33  | 39  | 30  | 82  | 113  | 1016 | 17  | 12-Apr-22 | Asymptomatic | I    |
| CAM001710 | 113222 | <i>C. coli</i> | 98.67% | 0.33% | 33.33% | 78  | 1,859,924 | 163,441 | ST1055  | ST-828  | 33  | 39  | 30  | 82  | 104  | 47   | 17  | 12-Apr-22 | Asymptomatic | VIII |
| CAM001748 | 113223 | <i>C. coli</i> | 99.56% | 0.44% | 0.00%  | 30  | 1,766,115 | 150,296 | ST11961 | ST-1150 | 103 | 110 | 103 | 140 | 210  | 899  | 79  | 18-Apr-22 | Diarrheal    | ?    |
| CAM002101 | 115990 | <i>C. coli</i> | 99.44% | 0.11% | 0.00%  | 47  | 1,890,148 | 175,729 | ST12397 |         | 33  | 110 | 30  | 82  | 1360 | 631  | 17  | 19-May-22 | Asymptomatic | III  |
| CAM002734 | 115999 | <i>C. coli</i> | 99.44% | 0.11% | 0.00%  | 61  | 1,867,659 | 164,093 | ST10234 |         | 247 | 748 | 30  | 82  | 113  | 47   | 17  | 5-Jul-22  | Asymptomatic | II   |
| PE1002465 | 115928 | <i>C. coli</i> | 99.37% | 0.11% | 0.00%  | 47  | 1,632,927 | 70,489  | ST829   | ST-828  | 33  | 39  | 30  | 82  | 113  | 43   | 17  | 10-Mar-11 | Asymptomatic | III  |
| PE1002984 | 115929 | <i>C. coli</i> | 98.80% | 0.49% | 0.00%  | 68  | 1,696,588 | 64,491  | ST10236 | ST-1150 | 103 | 110 | 30  | 833 | 113  | 164  | 79  | 4-May-11  | Asymptomatic | ?    |
| PE1003845 | 115930 | <i>C. coli</i> | 99.21% | 0.29% | 0.00%  | 153 | 1,645,866 | 19,913  | ST829   | ST-828  | 33  | 39  | 30  | 82  | 113  | 43   | 17  | 20-Jul-11 | Asymptomatic | III  |
| PE1004094 | 115931 | <i>C. coli</i> | 98.52% | 0.35% | 0.00%  | 291 | 1,780,978 | 11,156  | ST825   | ST-828  | 33  | 39  | 30  | 82  | 113  | 47   | 17  | 13-Aug-11 | Asymptomatic | I    |
| PE1004747 | 115932 | <i>C. coli</i> | 99.15% | 0.19% | 0.00%  | 89  | 1,825,987 | 141,244 | ST10234 | ST-828  | 247 | 748 | 30  | 82  | 113  | 47   | 17  | 11-Oct-11 | Asymptomatic | II   |
| PE1006339 | 115933 | <i>C. coli</i> | 99.44% | 0.43% | 0.00%  | 136 | 1,744,955 | 25,999  | ST10250 | ST-828  | 33  | 39  | 30  | 158 | 113  | 47   | 17  | 8-Feb-12  | Asymptomatic | VIII |
| PE1006365 | 115934 | <i>C. coli</i> | 99.44% | 0.20% | 0.00%  | 102 | 1,853,695 | 65,104  | ST12394 |         | 33  | 39  | 30  | 82  | 1359 | 164  | 17  | 9-Feb-12  | Asymptomatic | I    |
| PE1006426 | 115935 | <i>C. coli</i> | 99.44% | 0.40% | 0.00%  | 80  | 1,804,560 | 93,648  | ST10266 | ST-828  | 247 | 748 | 30  | 82  | 189  | 47   | 17  | 14-Feb-12 | Asymptomatic | II   |
| PE1006490 | 115936 | <i>C. coli</i> | 99.44% | 0.11% | 0.00%  | 52  | 1,677,251 | 74,625  | ST902   | ST-828  | 33  | 39  | 30  | 79  | 104  | 43   | 17  | 17-Feb-12 | Asymptomatic | I    |
| PE1006723 | 115937 | <i>C. coli</i> | 98.83% | 0.20% | 0.00%  | 98  | 1,889,006 | 65,453  | ST825   | ST-828  | 33  | 39  | 30  | 82  | 113  | 47   | 17  | 2-Mar-12  | Asymptomatic | II   |
| PE1006864 | 115938 | <i>C. coli</i> | 98.78% | 0.20% | 0.00%  | 116 | 1,880,049 | 58,843  | ST825   | ST-828  | 33  | 39  | 30  | 82  | 113  | 47   | 17  | 13-Mar-12 | Asymptomatic | II   |
| PE1007082 | 115939 | <i>C. coli</i> | 99.44% | 0.22% | 33.33% | 111 | 1,842,792 | 66,238  | ST1497  | ST-828  | 33  | 39  | 30  | 82  | 113  | 164  | 17  | 26-Mar-12 | Asymptomatic | I    |
| PE1007356 | 115940 | <i>C. coli</i> | 99.03% | 0.56% | 20.00% | 245 | 1,659,029 | 12,107  | ST10248 | ST-828  | 33  | 110 | 30  | 158 | 113  | 47   | 17  | 16-Apr-12 | Asymptomatic | VIII |
| PE1007381 | 115941 | <i>C. coli</i> | 99.72% | 0.11% | 0.00%  | 103 | 1,816,107 | 88,667  | ST10234 | ST-828  | 247 | 748 | 30  | 82  | 113  | 47   | 17  | 18-Apr-12 | Asymptomatic | II   |
| PE1007449 | 115942 | <i>C. coli</i> | 98.83% | 0.20% | 0.00%  | 89  | 1,835,467 | 80,033  | ST825   | ST-828  | 33  | 39  | 30  | 82  | 113  | 47   | 17  | 23-Apr-12 | Asymptomatic | I    |
| PE1007476 | 115943 | <i>C. coli</i> | 98.64% | 0.20% | 0.00%  | 124 | 1,870,446 | 42,363  | ST825   | ST-828  | 33  | 39  | 30  | 82  | 113  | 47   | 17  | 24-Apr-12 | Asymptomatic | II   |
| PE1007691 | 115944 | <i>C. coli</i> | 98.76% | 3.66% | 0.00%  | 288 | 1,829,440 | 32,463  | ST10259 | ST-1150 | 103 | 110 | 30  | 833 | 1048 | 1    | 79  | 8-May-12  | Asymptomatic | ?    |
| PE1007966 | 115945 | <i>C. coli</i> | 99.44% | 0.34% | 0.00%  | 97  | 1,819,553 | 41,671  | ST1497  | ST-828  | 33  | 39  | 30  | 82  | 113  | 164  | 17  | 24-May-12 | Asymptomatic | I    |
| PE1008355 | 112450 | <i>C. coli</i> | 99.39% | 2.23% | 0.00%  | 75  | 1,883,151 | 130,319 | ST825   | ST-828  | 33  | 39  | 30  | 82  | 113  | 47   | 17  | 25-Jun-12 | Asymptomatic | II   |
| PE1008376 | 115946 | <i>C. coli</i> | 99.44% | 0.11% | 0.00%  | 74  | 1,778,845 | 73,962  | ST10266 | ST-828  | 247 | 748 | 30  | 82  | 189  | 47   | 17  | 25-Jun-12 | Diarrheal    | II   |
| PE1008428 | 112451 | <i>C. coli</i> | 99.38% | 0.76% | 9.09%  | 132 | 1,807,449 | 53,810  | ST10266 | ST-828  | 247 | 748 | 30  | 82  | 189  | 47   | 17  | 30-Jun-12 | Diarrheal    | II   |
| PE1008575 | 115947 | <i>C. coli</i> | 99.09% | 0.44% | 0.00%  | 90  | 1,724,722 | 54,645  | ST10252 | ST-1150 | 103 | 110 | 30  | 833 | 1048 | 164  | 120 | 10-Jul-12 | Diarrheal    | ?    |
| PE1008592 | 115948 | <i>C. coli</i> | 99.44% | 0.20% | 0.00%  | 121 | 1,877,065 | 46,607  | ST825   | ST-828  | 33  | 39  | 30  | 82  | 113  | 47   | 17  | 10-Jul-12 | Asymptomatic | II   |
| PE1008668 | 115949 | <i>C. coli</i> | 99.41% | 0.30% | 25.00% | 179 | 1,665,589 | 21,391  | ST831   | ST-828  | 33  | 39  | 66  | 82  | 104  | 44   | 41  | 16-Jul-12 | Asymptomatic | VII  |
| PE1008723 | 115950 | <i>C. coli</i> | 99.37% | 0.20% | 25.00% | 51  | 1,648,867 | 118,929 | ST829   | ST-828  | 33  | 39  | 30  | 82  | 113  | 43   | 17  | 19-Jul-12 | Asymptomatic | III  |
| PE1008776 | 115951 | <i>C. coli</i> | 98.86% | 0.20% | 0.00%  | 51  | 1,852,347 | 146,044 | ST6275  | ST-828  | 33  | 39  | 103 | 82  | 113  | 47   | 17  | 24-Jul-12 | Asymptomatic | I    |
| PE1008805 | 115952 | <i>C. coli</i> | 99.01% | 0.18% | 33.33% | 227 | 1,745,044 | 15,185  | ST830   | ST-828  | 33  | 39  | 30  | 79  | 104  | 47   | 17  | 25-Jul-12 | Asymptomatic | II   |
| PE1008831 | 115953 | <i>C. coli</i> | 99.44% | 1.01% | 70.00% | 96  | 1,689,466 | 32,890  | ST825   | ST-828  | 33  | 39  | 30  | 82  | 113  | 47   | 17  | 27-Jul-12 | Diarrheal    | II   |
| PE1008862 | 115954 | <i>C. coli</i> | 98.99% | 0.48% | 25.00% | 177 | 1,707,878 | 18,655  | ST10257 | ST-1150 | 103 | 110 | 30  | 833 | 113  | 1    | 79  | 30-Jul-12 | Asymptomatic | ?    |
| PE1008890 | 115955 | <i>C. coli</i> | 99.44% | 0.14% | 0.00%  | 63  | 1,685,734 | 71,564  | ST825   | ST-828  | 33  | 39  | 30  | 82  | 113  | 47   | 17  | 1-Aug-12  | Asymptomatic | II   |
| PE1008972 | 115956 | <i>C. coli</i> | 98.23% | 0.28% | 0.00%  | 282 | 1,787,823 | 12,627  | ST825   | ST-828  | 33  | 39  | 30  | 82  | 113  | 47   | 17  | 7-Aug-12  | Asymptomatic | I    |
| PE1009079 | 115957 | <i>C. coli</i> | 99.72% | 0.11% | 0.00%  | 92  | 1,817,000 | 76,686  | ST10234 | ST-828  | 247 | 748 | 30  | 82  | 113  | 47   | 17  | 14-Aug-12 | Asymptomatic | II   |
| PE1009156 | 115958 | <i>C. coli</i> | 99.44% | 0.20% | 0.00%  | 97  | 1,835,731 | 73,647  | ST1497  | ST-828  | 33  | 39  | 30  | 82  | 113  | 164  | 17  | 18-Aug-12 | Asymptomatic | I    |
| PE1009159 | 115959 | <i>C. coli</i> | 99.22% | 3.20% | 50.00% | 276 | 1,701,238 | 13,126  | ST829   | ST-828  | 33  | 39  | 30  | 82  | 113  | 43   | 17  | 18-Aug-12 | Asymptomatic | III  |
| PE1009160 | 115960 | <i>C. coli</i> | 99.72% | 0.11% | 0.00%  | 50  | 1,780,178 | 130,416 | ST1173  | ST-828  | 33  | 39  | 30  | 82  | 113  | 56   | 17  | 18-Aug-12 | Asymptomatic | I    |
| PE1009428 | 115961 | <i>C. coli</i> | 99.72% | 0.11% | 0.00%  | 71  | 1,815,137 | 99,009  | ST10234 | ST-828  | 247 | 748 | 30  | 82  | 113  | 47   | 17  | 10-Sep-12 | Asymptomatic | II   |
| PE1009439 | 115962 | <i>C. coli</i> | 99.39% | 0.23% | 0.00%  | 92  | 1,833,262 | 66,872  | ST1497  | ST-828  | 33  | 39  | 30  | 82  | 113  | 164  | 17  | 11-Sep-12 | Asymptomatic | I    |

|           |        |                |        |       |        |     |           |         |         |         |     |     |     |     |     |     |    |           |              |      |
|-----------|--------|----------------|--------|-------|--------|-----|-----------|---------|---------|---------|-----|-----|-----|-----|-----|-----|----|-----------|--------------|------|
| PE1009684 | 115963 | <i>C. coli</i> | 99.46% | 0.52% | 0.00%  | 101 | 1,732,009 | 33,878  | ST10240 | ST-1150 | 103 | 110 | 103 | 140 | 764 | 164 | 79 | 29-Sep-12 | Asymptomatic | ?    |
| PE1009978 | 115964 | <i>C. coli</i> | 99.44% | 0.20% | 0.00%  | 103 | 1,838,251 | 52,070  | ST1497  | ST-828  | 33  | 39  | 30  | 82  | 113 | 164 | 17 | 20-Oct-12 | Asymptomatic | I    |
| PE1010102 | 115965 | <i>C. coli</i> | 98.55% | 1.26% | 0.00%  | 242 | 1,679,463 | 12,058  | ST10238 | ST-1150 | 103 | 110 | 30  | 833 | 11  | 1   | 79 | 31-Oct-12 | Asymptomatic | ?    |
| PE1010256 | 115966 | <i>C. coli</i> | 99.15% | 0.17% | 50.00% | 121 | 1,801,440 | 38,456  | ST10234 | ST-828  | 247 | 748 | 30  | 82  | 113 | 47  | 17 | 12-Nov-12 | Asymptomatic | II   |
| PE1011000 | 115967 | <i>C. coli</i> | 98.86% | 0.82% | 0.00%  | 107 | 1,835,265 | 45,807  | ST825   | ST-828  | 33  | 39  | 30  | 82  | 113 | 47  | 17 | 15-Jan-13 | Diarrheal    | I    |
| PE1011016 | 115968 | <i>C. coli</i> | 98.86% | 0.20% | 0.00%  | 100 | 1,830,975 | 58,022  | ST8737  | ST-828  | 33  | 110 | 30  | 82  | 113 | 47  | 17 | 16-Jan-13 | Asymptomatic | I    |
| PE1011046 | 115969 | <i>C. coli</i> | 99.21% | 0.45% | 33.33% | 144 | 1,770,098 | 29,213  | ST10260 | ST-828  | 33  | 39  | 30  | 78  | 113 | 56  | 17 | 19-Jan-13 | Diarrheal    | II   |
| PE1011852 | 115970 | <i>C. coli</i> | 98.77% | 0.11% | 0.00%  | 248 | 1,752,413 | 14,563  | ST10260 | ST-828  | 33  | 39  | 30  | 78  | 113 | 56  | 17 | 1-Apr-13  | Diarrheal    | II   |
| PE1011946 | 115971 | <i>C. coli</i> | 99.44% | 0.57% | 22.22% | 58  | 1,673,874 | 80,311  | ST829   | ST-828  | 33  | 39  | 30  | 82  | 113 | 43  | 17 | 10-Apr-13 | Asymptomatic | VIII |
| PE1012031 | 112453 | <i>C. coli</i> | 99.44% | 0.22% | 33.33% | 44  | 1,661,788 | 98,537  | ST10250 | ST-828  | 33  | 39  | 30  | 158 | 113 | 47  | 17 | 17-Apr-13 | Asymptomatic | VIII |
| PE1012319 | 115972 | <i>C. coli</i> | 99.44% | 0.11% | 0.00%  | 133 | 1,883,409 | 35,856  | ST10234 | ST-828  | 247 | 748 | 30  | 82  | 113 | 47  | 17 | 13-May-13 | Asymptomatic | II   |
| PE1012321 | 112454 | <i>C. coli</i> | 99.44% | 0.11% | 0.00%  | 80  | 1,805,615 | 92,411  | ST10234 | ST-828  | 247 | 748 | 30  | 82  | 113 | 47  | 17 | 13-May-13 | Diarrheal    | VII  |
| PE1012587 | 115973 | <i>C. coli</i> | 99.38% | 0.57% | 33.33% | 84  | 1,808,377 | 78,377  | ST825   | ST-828  | 33  | 39  | 30  | 82  | 113 | 47  | 17 | 5-Jun-13  | Asymptomatic | VIII |
| PE1012753 | 115974 | <i>C. coli</i> | 99.15% | 0.47% | 0.00%  | 85  | 1,811,032 | 62,218  | ST10234 | ST-828  | 247 | 748 | 30  | 82  | 113 | 47  | 17 | 25-Jun-13 | Asymptomatic | II   |
| PE1013325 | 115975 | <i>C. coli</i> | 98.82% | 0.44% | 33.33% | 56  | 1,647,363 | 74,925  | ST12395 |         | 33  | 939 | 30  | 82  | 113 | 47  | 17 | 21-Aug-13 | Asymptomatic | I    |
| PE1014576 | 115976 | <i>C. coli</i> | 99.39% | 0.44% | 0.00%  | 43  | 1,715,407 | 140,309 | ST10274 | ST-1150 | 103 | 110 | 103 | 833 | 11  | 1   | 79 | 4-Jan-14  | Asymptomatic | ?    |

Supplementary Table 2A. Antimicrobial resistance phenotypes, genes and mutations among *C. jejuni* isolates.

| Sample Name | QUINOLONES |                       | MACROLIDES |           |                 | TETRACYCLINES |             | AMINOGLYCOSIDES |                                                  |           |           | BETA-LACTAMS  |          |           |          | CARBAPENEMS |          | AMPHENICOL                             |                    | MDR                      |                                      |  |  |
|-------------|------------|-----------------------|------------|-----------|-----------------|---------------|-------------|-----------------|--------------------------------------------------|-----------|-----------|---------------|----------|-----------|----------|-------------|----------|----------------------------------------|--------------------|--------------------------|--------------------------------------|--|--|
|             | CIP        |                       | AZM        | ERY       |                 | TET           |             | GEN             |                                                  | AMC       |           | AMP           |          | IMP       |          | CHL         |          | Num AB Classes w/<br>Phenotypic Resist | cmeABC<br>Genotype | Inverter Repeat Mutation | Inverter Repeat<br>Functional Effect |  |  |
|             | Phenotype  | Genotype              | Phenotype  | Phenotype | Genotype        | Phenotype     | Genotype    | Phenotype       | Genotype                                         | Phenotype | Phenotype | Genotype      | TATA box | Phenotype | Genotype | Phenotype   | Genotype |                                        |                    |                          |                                      |  |  |
| CAM000279   | R          | <i>gyrA</i> Thr186Ile | S          | 99        | 0               | S             | <i>tetO</i> | S               | <i>aad9; aadE; ant6la; aph3lla</i>               | R         | 99        | <i>blaOXA</i> | Active   | S         | 0        | 99          | 0        | 2                                      | RE-cmeABC          | TGTAATAAATAAATTATTACA    | 1                                    |  |  |
| CAM000391   | R          | <i>gyrA</i> Thr186Ile | S          | 99        | 0               | R             | <i>tetO</i> | S               | <i>aad9; aadE; ant6la; aph3lla</i>               | S         | 99        | <i>blaOXA</i> | Active   | S         | 0        | 99          | 0        | 2                                      | RE-cmeABC          | TGTAATAAATAATTGCA        | 1                                    |  |  |
| CAM000396   | S          | 0                     | S          | 99        | 0               | S             | 0           | S               |                                                  | S         | 99        | 0             | NA       | S         | 0        | 99          | 0        | 0                                      | Wild Type          | TGTAATAAATAATTACA        | 0                                    |  |  |
| CAM000518   | R          | <i>gyrA</i> Thr186Ile | S          | 99        | 0               | S             | 0           | S               |                                                  | S         | 99        | 0             | NA       | S         | 0        | 99          | 0        | 1                                      | Wild Type          | TGTAATAAATAATTACA        | 0                                    |  |  |
| CAM000524   | R          | <i>gyrA</i> Thr186Ile | S          | 99        | 0               | R             | <i>tetO</i> | S               | <i>sat4; aad6; aad9; ant6l; aaph2lf; aph3lla</i> | S         | 99        | <i>blaOXA</i> | Active   | S         | 0        | 99          | 0        | 2                                      | RE-cmeABC          | TGTAATAAATAATTATA        | 0                                    |  |  |
| CAM000702   | R          | <i>gyrA</i> Thr186Ile | S          | 99        | 0               | R             | <i>tetO</i> | S               | <i>aad9; aadE; ant6la; aph3lla</i>               | S         | 99        | <i>blaOXA</i> | Active   | S         | 0        | 99          | 0        | 2                                      | Wild Type          | TGTAATAAATAAATTATTACA    | 1                                    |  |  |
| CAM000717   | R          | <i>gyrA</i> Thr186Ile | S          | 99        | 0               | R             | <i>tetO</i> | S               | <i>aad9; aadE; ant6la; aph3lla</i>               | S         | 99        | <i>blaOXA</i> | Active   | S         | 0        | 99          | 0        | 2                                      | Wild Type          | TGTAATAAATAAATTATTACA    | 1                                    |  |  |
| CAM000766   | R          | <i>gyrA</i> Thr186Ile | S          | 99        | 0               | S             | <i>tetO</i> | S               | <i>aad9; aadE; ant6la; aph3lla</i>               | S         | 99        | <i>blaOXA</i> | Active   | S         | 0        | 99          | 0        | 1                                      | RE-cmeABC          | TGTAATAA-TATTACA         | 1                                    |  |  |
| CAM000833   | S          | <i>gyrA</i> Thr186Ile | S          | R         | 0               | I             | <i>tetO</i> | S               |                                                  | S         | 99        | <i>blaOXA</i> | Inactive | S         | 0        | 99          | 0        | 2                                      | Wild Type          | TGTAATAAATAATTACA        | 0                                    |  |  |
| CAM000854   | R          | <i>gyrA</i> Thr186Ile | S          | S         | 0               | R             | <i>tetO</i> | S               |                                                  | S         | 99        | <i>blaOXA</i> | Inactive | S         | 0        | 99          | 0        | 2                                      | Wild Type          | TGTAATAAATAATTACA        | 0                                    |  |  |
| CAM001070   | S          | 0                     | S          | S         | 0               | S             | 0           | S               |                                                  | S         | 99        | <i>blaOXA</i> | Inactive | S         | 0        | 99          | 0        | 0                                      | Wild Type          | TGTAATAAATAATTACA        | 0                                    |  |  |
| CAM001075   | S          | <i>gyrA</i> Thr186Ile | 99         | S         | 0               | S             | <i>tetO</i> | I               | <i>aad9; aadE; ant6la; aph3lla</i>               | S         | 99        | <i>blaOXA</i> | Active   | S         | 0        | 99          | 0        | 1                                      | RE-cmeABC          | TGTAATAAATAATTATA        | 0                                    |  |  |
| CAM001220   | S          | 0                     | S          | S         | 0               | S             | 0           | S               |                                                  | 99        | 99        | 0             | NA       | S         | 0        | 99          | 0        | 0                                      | Wild Type          | TGTAATAAATAATTACA        | 0                                    |  |  |
| CAM001243   | S          | 0                     | S          | S         | 0               | S             | <i>tetO</i> | I               |                                                  | 99        | 99        | 0             | NA       | S         | 0        | 99          | 0        | 1                                      | Wild Type          | TGTAATAAATAATTACA        | 0                                    |  |  |
| CAM001343   | S          | 0                     | S          | S         | 0               | S             | 0           | S               |                                                  | 99        | 99        | <i>blaOXA</i> | Active   | S         | 0        | 99          | 0        | 0                                      | Wild Type          | TGTAATAAATAATTACA        | 0                                    |  |  |
| CAM001343   | S          | 0                     | S          | S         | 0               | R             | 0           | S               |                                                  | 99        | 99        | <i>blaOXA</i> | Active   | S         | 0        | 99          | 0        | 1                                      | Wild Type          | TGTAATAAATAATTACA        | 0                                    |  |  |
| CAM001368   | R          | <i>gyrA</i> Thr186Ile | S          | S         | 0               | R             | 0           | S               | <i>aad9; aadE; ant6la; aph2lf; aph3lla</i>       | 99        | 99        | <i>blaOXA</i> | Active   | S         | 0        | 99          | 0        | 2                                      | RE-cmeABC          | TGTAATAAATAATTGCA        | 1                                    |  |  |
| CAM001518   | S          | 0                     | S          | S         | 0               | S             | 0           | S               |                                                  | I         | 99        | 0             | NA       | S         | 0        | 99          | 0        | 1                                      | Wild Type          | TGTAATAAATAATTACA        | 0                                    |  |  |
| CAM001568   | S          | <i>gyrA</i> Thr186Ile | S          | S         | 23S rRNA A2075G | I             | <i>tetO</i> | S               | <i>aad9; aadE; ant6la; aph3lla</i>               | S         | 99        | <i>blaOXA</i> | Active   | S         | 0        | 99          | 0        | 1                                      | RE-cmeABC          | TGTAATAAATAATTGCA        | 1                                    |  |  |
| CAM001643   | S          | 0                     | S          | S         | 0               | S             | 0           | S               |                                                  | S         | 99        | 0             | NA       | S         | 0        | 99          | 0        | 0                                      | Wild Type          | TGTAATAAATAATTACA        | 0                                    |  |  |
| CAM001900   | R          | <i>gyrA</i> Thr186Ile | S          | S         | 0               | R             | 0           | S               | <i>aad9; aadE; ant6la; aph3lla</i>               | S         | 99        | <i>blaOXA</i> | Active   | S         | 0        | 99          | 0        | 2                                      | RE-cmeABC          | TGTAATAAATAATTACA        | 0                                    |  |  |
| CAM001983   | R          | <i>gyrA</i> Thr186Ile | S          | S         | 0               | R             | <i>tetO</i> | R               | <i>aad9; aph2lf; aph3lla</i>                     | S         | 99        | <i>blaOXA</i> | Active   | S         | 0        | 99          | 0        | 3                                      | RE-cmeABC          | TGTAATAAATAATTACA        | 0                                    |  |  |
| CAM002007   | R          | <i>gyrA</i> Thr186Ile | S          | S         | 0               | R             | <i>tetO</i> | S               |                                                  | S         | 99        | <i>blaOXA</i> | Active   | S         | 0        | 99          | 0        | 2                                      | RE-cmeABC          | TGTAATAAATAATTATA        | 0                                    |  |  |
| CAM002070   | R          | <i>gyrA</i> Thr186Ile | S          | S         | 0               | R             | <i>tetO</i> | S               | <i>aad9; aph2lf; aph3lla</i>                     | S         | 99        | <i>blaOXA</i> | Active   | S         | 0        | 99          | 0        | 2                                      | RE-cmeABC          | TGTAATAAATAATTACA        | 0                                    |  |  |
| CAM002255   | S          | <i>gyrA</i> Thr186Ile | S          | S         | 0               | S             | <i>tetO</i> | S               |                                                  | S         | 99        | <i>blaOXA</i> | Active   | S         | 0        | 99          | 0        | 0                                      | Wild Type          | TGTAATAAATAATTATA        | 0                                    |  |  |
| CAM002378   | R          | <i>gyrA</i> Thr186Ile | S          | S         | 0               | R             | <i>tetO</i> | I               | <i>aad9; aph2lf</i>                              | S         | 99        | <i>blaOXA</i> | Active   | S         | 0        | 99          | 0        | 3                                      | Wild Type          | TGTAATAAATAATTACA        | 0                                    |  |  |
| CAM002400   | R          | <i>gyrA</i> Thr186Ile | S          | S         | 0               | R             | <i>tetO</i> | S               | <i>aad9; aadE; ant6la; aph3lla</i>               | S         | 99        | <i>blaOXA</i> | Active   | S         | 0        | 99          | 0        | 2                                      | RE-cmeABC          | TGTAATAA-TATTACA         | 1                                    |  |  |
| CAM002438   | R          | <i>gyrA</i> Thr186Ile | S          | S         | 0               | R             | <i>tetO</i> | S               | <i>aad9; aadE; ant6la; aph3lla</i>               | S         | 99        | <i>blaOXA</i> | Active   | S         | 0        | 99          | 0        | 2                                      | RE-cmeABC          | TGTAATAAATAATTATA        | 0                                    |  |  |
| CAM002558   | R          | <i>gyrA</i> Thr186Ile | S          | S         | 0               | R             | <i>tetO</i> | S               | <i>aad9; aadE; ant6la; aph3lla</i>               | S         | 99        | <i>blaOXA</i> | Active   | S         | 0        | 99          | 0        | 2                                      | RE-cmeABC          | TGTAATAAATAATTATA        | 0                                    |  |  |
| CAM002564   | R          | <i>gyrA</i> Thr186Ile | S          | S         | 0               | R             | <i>tetO</i> | S               | <i>aad9; aadE; ant6la; aph3lla</i>               | S         | 99        | <i>blaOXA</i> | Active   | S         | 0        | 99          | 0        | 2                                      | RE-cmeABC          | TGTAATAAATAAATTATTACA    | 1                                    |  |  |
| CAM002670   | R          | <i>gyrA</i> Thr186Ile | S          | S         | 0               | R             | 0           | S               | <i>aad9; aadE; ant6la; aph3lla</i>               | S         | 99        | <i>blaOXA</i> | Active   | S         | 0        | 99          | 0        | 2                                      | RE-cmeABC          | TGTAATAAATAATTATA        | 0                                    |  |  |
| CAM002685   | R          | <i>gyrA</i> Thr186Ile | S          | S         | 0               | R             | <i>tetO</i> | S               | <i>aad9; aadE; ant6la; aph3lla</i>               | S         | 99        | <i>blaOXA</i> | Active   | S         | 0        | 99          | 0        | 2                                      | RE-cmeABC          | TGTAATAAATAAATTATTACA    | 1                                    |  |  |
| CAM002887   | R          | <i>gyrA</i> Thr186Ile | S          | R         | 0               | R             | <i>tetO</i> | I               | <i>aad9; aph2lf; aph3lla</i>                     | S         | 99        | <i>blaOXA</i> | Active   | S         | 0        | 99          | 0        | 4                                      | RE-cmeABC          | TGTAATAAATAAATTATTACA    | 1                                    |  |  |
| CAM002934   | R          | <i>gyrA</i> Thr186Ile | S          | S         | 0               | R             | <i>tetO</i> | R               | <i>aad9; aph2lf; aph3lla</i>                     | S         | 99        | <i>blaOXA</i> | Active   | S         | 0        | 99          | 0        | 3                                      | RE-cmeABC          | TGTAATAAATAATTGCA        | 1                                    |  |  |
| CAM002957   | R          | <i>gyrA</i> Thr186Ile | S          | S         | 0               | R             | <i>tetO</i> | R               | <i>aad9; aph2lf; aph3lla</i>                     | S         | 99        | <i>blaOXA</i> | Active   | S         | 0        | 99          | 0        | 3                                      | RE-cmeABC          | TGTAATAAATAATTATA        | 0                                    |  |  |
| CAM003004   | R          | <i>gyrA</i> Thr186Ile | S          | S         | 0               | R             | <i>tetO</i> | S               |                                                  | S         | 99        | <i>blaOXA</i> | Active   | S         | 0        | 99          | 0        | 2                                      | Wild Type          | TGTAATAAATAATTATA        | 0                                    |  |  |
| CAM003047   | R          | <i>gyrA</i> Thr186Ile | S          | S         | 0               | R             | <i>tetO</i> | S               |                                                  | S         | 99        | <i>blaOXA</i> | Active   | S         | 0        | 99          | 0        | 2                                      | Wild Type          | TGTAATAAATAATTACA        | 0                                    |  |  |
| CAM003063   | R          | <i>gyrA</i> Thr186Ile | S          | S         | 0               | R             | <i>tetO</i> | R               | <i>aad9; aph2lf; aph3lla</i>                     | S         | 99        | <i>blaOXA</i> | Active   | S         | 0        | 99          | 0        | 3                                      | RE-cmeABC          | TGTAATAAATAATTACA        | 0                                    |  |  |
| CAM003070   | S          | 0                     | S          | S         | 0               | S             | 0           | S               |                                                  | S         | 99        | 0             | NA       | S         | 0        | 99          | 0        | 0                                      | Wild Type          | TGTAATAAATAATTATA        | 0                                    |  |  |
| CAM003118   | S          | 0                     | S          | S         | 0               | S             | 0           | S               |                                                  | S         | 99        | 0             | NA       | S         | 0        | 99          | 0        | 0                                      | Wild Type          | TGTAATAAATAATTACA        | 0                                    |  |  |
| PE1000386   | R          | <i>gyrA</i> Thr186Ile | R          | R         | 23S rRNA A2075G | R             | <i>tetO</i> | S               |                                                  | S         | R         | <i>blaOXA</i> | Active   | 99        | 0        | S           | 0        | 4                                      | RE-cmeABC          | TGTAATAAAA-ATTACA        | 1                                    |  |  |
| PE1000388   | R          | <i>gyrA</i> Thr186Ile | R          | R         | 23S rRNA A2075G | R             | <i>tetO</i> | S               |                                                  | S         | R         | <i>blaOXA</i> | Active   | 99        | 0        | S           | 0        | 4                                      | RE-cmeABC          | TGTAATAAAA-ATTACA        | 1                                    |  |  |
| PE1000656   | R          | 0                     | S          | S         | 0               | R             | 0           | S               |                                                  | S         | I         | <i>blaOXA</i> | Inactive | 99        | 0        | S           | 0        | 3                                      | Wild Type          | nd                       |                                      |  |  |
| PE1002074   | S          | 0                     | S          | S         | 0               | S             | 0           | S               |                                                  | S         | S         | 0             | NA       | 99        | 0        | S           | 0        | 0                                      | Wild Type          | TGTAATAAATAATTACA        | 0                                    |  |  |
| PE1002325   | R          | <i>gyrA</i> Thr186Ile | R          | R         | 0               | R             | <i>tetO</i> | S               |                                                  | S         | R         | <i>blaOXA</i> | Active   | 99        | 0        | S           | 0        | 4                                      | RE-cmeABC          | TGTAATAAATAATTGCA        | 1                                    |  |  |
| PE1002384   | R          | <i>gyrA</i> Thr186Ile | S          | S         | 0               | R             | <i>tetO</i> | S               |                                                  | S         | R         | <i>blaOXA</i> | Active   | 99        | 0        | S           | 0        | 3                                      | RE-cmeABC          | TGTAATAAATAATTATA        | 0                                    |  |  |
| PE1002577   | S          | 0                     | S          | S         | 0               | S             | 0           | S               |                                                  | S         | S         | 0             | NA       | 99        | 0        | S           | 0        | 0                                      | Wild Type          | TGTAATAAATAATTACA        | 0                                    |  |  |
| PE1002933   | R          | 0                     | S          | S         | 0               | S             | 0           | S               |                                                  | S         | R         | 0             | NA       | 99        | 0        | S           | 0        | 2                                      | Wild Type          | TGTAATAAATAATTACA        | 0                                    |  |  |
| PE1003343   | S          | 0                     | S          | S         | 0               | S             | 0           | S               |                                                  | S         | S         | 0             | NA       | 99        | 0        | S           | 0        | 0                                      | Wild Type          | TGTAATAAATAATTACA        | 0                                    |  |  |
| PE1003437   | S          | 0                     | S          | S         | 0               | S             | 0           | S               |                                                  | S         | S         | 0             | NA       | 99        | 0        | S           | 0        | 0                                      | Wild Type          | TGTAATAAATAATTACA        | 0                                    |  |  |
| PE1003872   | S          | 0                     | S          | S         | 0               | S             | 0           | S               |                                                  | S         | S         | <i>blaOXA</i> | Inactive | 99        | 0        | S           | 0        | 0                                      | Wild Type          | TGTAATAAATAATTACA        | 0                                    |  |  |
| PE1004853   | R          | <i>gyrA</i> Thr186Ile | R          | S         | 0               | R             | <i>tetO</i> | S               |                                                  | S         | R         | <i>blaOXA</i> | Inactive | 99        | 0        | S           | 0        | 4                                      | RE-cmeABC          | TGTAATAAATAATTGACA       | 1                                    |  |  |
| PE1005128   | S          | 0                     | S          | S         | 0               | S             | 0           | S               |                                                  | S         | R         | <i>blaOXA</i> | Inactive | 99        | 0        | S           | 0        | 1                                      | Wild Type          | TGTAATAAATAATTACA        | 0                                    |  |  |
| PE1005412   | R          | 0                     | S          | S         | 0               | S             | 0           | S               |                                                  | S         | S         | <i>blaOXA</i> | Inactive | 99        | 0        | S           | 0        | 1                                      | Wild Type          | TGTAATAAATAATTACA        | 0                                    |  |  |
| PE1006126   | R          | <i>gyrA</i> Thr186Ile | R          | R         | 23S rRNA A2075G | R             | <i>tetO</i> | S               | <i>rpsL</i> K43R                                 | S         | R         | <i>blaOXA</i> | Inactive | 99        | 0        | S           | 0        | 4                                      | RE-cmeABC          | TGTAATAAATAATTGCA        | 1                                    |  |  |
| PE1006841   | S          | 0                     | S          | S         | 0               | R             | 0           | S               |                                                  | S         | S         | 0             | NA       | 99        | 0        | S           | 0        | 1                                      | Wild Type          | nd                       |                                      |  |  |
| PE1007005   | R          | <i>gyrA</i> Thr186Ile | S          | S         | 0               | S             | 0           | S               |                                                  | S         | S         | 0             | NA       | 99        | 0        | S           | 0        | 1                                      | Wild Type          | TGTAATAAATAATTACA        | 0                                    |  |  |
| PE1007060   | R          | 0                     | S          | S         | 0               | S             | 0           | S               |                                                  | S         | S         | <i>blaOXA</i> | Inactive | 99        | 0        | S           | 0        | 1                                      | Wild Type          | TGTAATAAATAATTACA        | 0                                    |  |  |
| PE1007218   | S          | 0                     | S          | S         | 0               | S             | 0           | S               |                                                  | S         | S         | <i>blaOXA</i> | Inactive | 99        | 0        | S           | 0        | 0                                      | Wild Type          | TGTAATAAATAATTACA        | 0                                    |  |  |
| PE1007358   | R          | <i>gyrA</i> Thr186Ile | S          | S         | 0               | R             | <i>tetO</i> | S               |                                                  | S         | S         | 0             | NA       | 99        | 0        | S           | 0        | 2                                      | Wild Type          | TGTAATAAATAATTACA        | 0                                    |  |  |
| PE1007369   | R          | 0                     | R          | S         | 0               | R             | 0           | S               |                                                  | S         | R         | <i>blaOXA</i> | Active   | 99        | 0        | S           | 0        | 4                                      | Wild Type          | TGTAATAAATAATTACA        | 0                                    |  |  |
| PE1007487   | R          | 0                     | S          | S         | 0               | S             | 0           | S               |                                                  | S         | R         | 0             | NA       | 99        | 0        | S           | 0        | 2                                      | Wild Type          | nd                       |                                      |  |  |
| PE1007769   | R          |                       |            |           |                 |               |             |                 |                                                  |           |           |               |          |           |          |             |          |                                        |                    |                          |                                      |  |  |

|           |   |                       |   |   |                 |   |             |   |   |   |               |              |    |   |   |   |   |           |                   |   |
|-----------|---|-----------------------|---|---|-----------------|---|-------------|---|---|---|---------------|--------------|----|---|---|---|---|-----------|-------------------|---|
| PE1008208 | S | 0                     | S | S | 0               | R | 0           | S | S | R | 0             | NA           | 99 | 0 | S | 0 | 2 | Wild Type | TGTAATAAAATATTACA | 0 |
| PE1008411 | R | <i>gyrA</i> Thr186Ile | S | S | 0               | S | 0           | S | S | S | <i>blaOXA</i> | Inactive     | 99 | 0 | S | 0 | 1 | Wild Type | TGTAATAAAAATTACA  | 0 |
| PE1008979 | S | 0                     | S | S | 0               | S | 0           | S | S | S | 0             | NA           | 99 | 0 | S | 0 | 0 | Wild Type | TGTAATAAAATATTACA | 0 |
| PE1009014 | R | <i>gyrA</i> Thr186Ile | R | R | 0               | R | <i>tetO</i> | S | S | I | 0             | NA           | 99 | 0 | S | 0 | 4 | RE-cmeABC | TGTAATAAAATATTGCA | 1 |
| PE1009047 | R | <i>gyrA</i> Thr186Ile | S | S | 0               | S | <i>tetO</i> | S | S | S | <i>blaOXA</i> | Active       | 99 | 0 | S | 0 | 1 | Wild Type | TGTAATAAAAATTATA  | 1 |
| PE1009519 | R | <i>gyrA</i> Thr186Ile | S | S | 0               | R | <i>tetO</i> | S | S | R | <i>blaOXA</i> | Active       | 99 | 0 | S | 0 | 3 | RE-cmeABC | nd                |   |
| PE1009555 | R | 0                     | S | R | 0               | R | 0           | S | S | R | 0             | NA           | 99 | 0 | S | 0 | 4 | Wild Type | TGTAATAAAATATTACA | 0 |
| PE1009604 | S | 0                     | S | S | 0               | S | 0           | S | S | S | 0             | NA           | 99 | 0 | S | 0 | 0 | Wild Type | TGTAATAAAATATTACA | 0 |
| PE1009686 | R | <i>gyrA</i> Thr186Ile | R | R | 23S rRNA A2075G | R | <i>tetO</i> | S | S | R | <i>blaOXA</i> | Active       | 99 | 0 | S | 0 | 4 | RE-cmeABC | TGTAATAAAATATTACA | 1 |
| PE1009993 | R | <i>gyrA</i> Thr186Ile | S | S | 0               | R | <i>tetO</i> | S | S | R | <i>blaOXA</i> | Active       | 99 | 0 | S | 0 | 3 | RE-cmeABC | TGTAATAAAAATTACA  | 1 |
| PE1010009 | R | <i>gyrA</i> Thr186Ile | S | S | 0               | S | 0           | S | S | S | 0             | NA           | 99 | 0 | S | 0 | 1 | Wild Type | TGTAATAAAATATTACA | 0 |
| PE1010051 | R | 0                     | S | R | 0               | R | 0           | S | S | R | 0             | NA           | 99 | 0 | S | 0 | 4 | Wild Type | TGTAATAAAATATTACA | 0 |
| PE1010492 | R | 0                     | S | S | 0               | S | 0           | S | S | R | <i>blaOXA</i> | Inactive     | 99 | 0 | S | 0 | 2 | Wild Type | TGTAATAAAAATTACA  | 0 |
| PE1010503 | R | 0                     | S | S | 0               | S | 0           | S | S | S | <i>blaOXA</i> | Inactive     | 99 | 0 | S | 0 | 1 | Wild Type | TGTAATAAAATATTACA | 0 |
| PE1010600 | R | <i>gyrA</i> Thr186Ile | S | S | 0               | R | <i>tetO</i> | S | S | R | <i>blaOXA</i> | Active       | 99 | 0 | S | 0 | 3 | RE-cmeABC | TGTAATAAAATATTGCA | 1 |
| PE1010779 | R | <i>gyrA</i> Thr186Ile | S | S | 0               | S | 0           | S | S | S | 0             | NA           | 99 | 0 | S | 0 | 1 | Wild Type | TGTAATAAAATATTACA | 0 |
| PE1010901 | R | <i>gyrA</i> Thr186Ile | S | S | 0               | S | 0           | S | S | S | 0             | NA           | 99 | 0 | S | 0 | 1 | Wild Type | TGTAATAAAATATTACA | 0 |
| PE1010984 | R | 0                     | S | S | 0               | S | 0           | S | S | S | 0             | NA           | 99 | 0 | S | 0 | 1 | Wild Type | TGTAATAAAATATTACA | 0 |
| PE1011169 | R | <i>gyrA</i> Thr186Ile | S | S | 0               | S | 0           | S | S | S | 0             | NA           | 99 | 0 | S | 0 | 1 | Wild Type | TGTAATAAAATATTACA | 0 |
| PE1011268 | R | <i>gyrA</i> Thr186Ile | S | S | 0               | S | 0           | S | S | S | 0             | NA           | 99 | 0 | S | 0 | 1 | Wild Type | TGTAATAAAATATTACA | 0 |
| PE1011396 | R | 0                     | S | R | 0               | R | 0           | S | S | R | <i>blaOXA</i> | Inactive     | 99 | 0 | S | 0 | 4 | Wild Type | TGTAATAAAATATTACA | 0 |
| PE1011468 | S | 0                     | S | S | 0               | S | 0           | S | S | S | <i>blaOXA</i> | Undetermined | 99 | 0 | S | 0 | 0 | Wild Type | TGTAATAAAATATTACA | 1 |
| PE1011483 | R | <i>gyrA</i> Thr186Ile | S | S | 0               | S | 0           | S | S | S | 0             | NA           | 99 | 0 | S | 0 | 1 | Wild Type | TGTAATAAAATATTACA | 0 |
| PE1011539 | R | <i>gyrA</i> Thr186Ile | R | R | 0               | R | <i>tetO</i> | R | I | R | <i>blaOXA</i> | Active       | 99 | 0 | S | 0 | 5 | RE-cmeABC | TGTAATAAAATTACA   | 1 |
| PE1011695 | S | 0                     | S | S | 0               | S | 0           | S | S | S | 0             | NA           | 99 | 0 | S | 0 | 0 | Wild Type | TGTAATAAAATATTACA | 0 |
| PE1011900 | S | 0                     | S | S | 0               | S | 0           | S | S | S | 0             | NA           | 99 | 0 | S | 0 | 0 | Wild Type | TGTAATAAAATATTACA | 0 |
| PE1013701 | R | 0                     | S | S | 0               | S | 0           | S | S | S | 0             | NA           | 99 | 0 | S | 0 | 1 | Wild Type | TGTAATAAAATATTACA | 0 |
| PE1014386 | R | <i>gyrA</i> Thr186Ile | S | S | 0               | R | <i>tetO</i> | S | S | R | <i>blaOXA</i> | Active       | 99 | 0 | S | 0 | 3 | Wild Type | TGTAATAAAATATTACA | 0 |
| PE1014586 | R | <i>gyrA</i> Thr186Ile | R | R | 23S rRNA A2075G | R | <i>tetO</i> | S | S | R | <i>blaOXA</i> | Active       | 99 | 0 | S | 0 | 4 | RE-cmeABC | TGCAATAAAATATTACA | 0 |
| PE1016056 | R | 0                     | R | R | 0               | S | 0           | R | S | S | 0             | NA           | 99 | 0 | S | 0 | 3 | Wild Type | TGTAATAAAATATTACA | 0 |
| PE1016428 | S | 0                     | S | S | 0               | S | 0           | S | S | S | 0             | NA           | 99 | 0 | S | 0 | 0 | Wild Type | TGTAATAAAAATTACA  | 0 |

99 = Not performed.



Supplementary Table 2B. Antimicrobial resistance phenotypes, genes and mutations among *C. coli* isolates.

| Sample Name | QUINOLONES       |                       | MACROLIDES       |                  |                 | TETRACYCLINES    |             | AMINOGLYCOSIDES  |                                                  |                  |                  | BETA-LACTAMS  |              |                  | CARBAPENEMS |                  | AMPHENICOL |                                        | MDR                |                          |                                      |
|-------------|------------------|-----------------------|------------------|------------------|-----------------|------------------|-------------|------------------|--------------------------------------------------|------------------|------------------|---------------|--------------|------------------|-------------|------------------|------------|----------------------------------------|--------------------|--------------------------|--------------------------------------|
|             | CIP<br>Phenotype | Genotype              | AZM<br>Phenotype | ERY<br>Phenotype | Genotype        | TET<br>Phenotype | Genotype    | GEN<br>Phenotype | Genotype                                         | AMC<br>Phenotype | AMP<br>Phenotype | Genotype      | TATA box     | IMP<br>Phenotype | Genotype    | CHL<br>Phenotype | Genotype   | Num AB Classes w/<br>Phenotypic Resist | cmeABC<br>Genotype | Inverter Repeat Mutation | Inverter Repeat<br>Functional Effect |
|             |                  |                       |                  |                  |                 |                  |             |                  |                                                  |                  |                  |               |              |                  |             |                  |            |                                        |                    |                          |                                      |
| CAM000139   | R                | <i>gyrA</i> Thr186Ile | R                | 99               | 0               | R                | <i>tetO</i> | R                | <i>ant6la; aad6; aph3lla; aad9</i>               | I                | 99               | <i>blaOXA</i> | Active       | S                | 0           | 99               | 0          | 5                                      | Wild Type          | TGTAATAAATATTACA         | 0                                    |
| CAM000431   | S                | <i>gyrA</i> Thr186Ile | S                | 99               | 0               | S                | <i>tetO</i> | S                |                                                  | S                | 99               | <i>blaOXA</i> | Active       | S                | 0           | 99               | 0          | 0                                      | Wild Type          | TGCAATAAATATTACA         | 0                                    |
| CAM000646   | R                | <i>gyrA</i> Thr186Ile | S                | 99               | 0               | R                | <i>tetO</i> | S                | <i>sat4; ant6la; aad6; aph3lla</i>               | S                | 99               | <i>blaOXA</i> | Active       | S                | 0           | 99               | 0          | 2                                      | RE-cmeABC          | TGTAATAAATATTACA         | 0                                    |
| CAM001343   | S                | <i>gyrA</i> Thr186Ile | S                | S                | 23S rRNA A2075G | S                | <i>tetO</i> | S                | <i>sat4; ant6la; aad6; aph3lla; aad9; aph2lf</i> | 99               | 99               | <i>blaOXA</i> | Active       | S                | 0           | 99               | 0          | 0                                      | Wild Type          | TGTAATAAATATTACA         | 0                                    |
| CAM001347   | R                | <i>gyrA</i> Thr186Ile | S                | S                | 23S rRNA A2075G | R                | <i>tetO</i> | R                | <i>sat4; ant6la; aad6; aph3lla; aad9; aph2lf</i> | 99               | 99               | <i>blaOXA</i> | Active       | S                | 0           | 99               | 0          | 3                                      | Wild Type          | TGTAATAAATATTACA         | 0                                    |
| CAM001351   | I                | <i>gyrA</i> Thr186Ile | S                | S                | 23S rRNA A2075G | R                | <i>tetO</i> | S                | <i>sat4; ant6la; aad6; aph3lla; aad9; aph2lf</i> | 99               | 99               | <i>blaOXA</i> | Active       | S                | 0           | 99               | 0          | 2                                      | Wild Type          | TGTAATAAATATTACA         | 0                                    |
| CAM001567   | S                | 0                     | S                | S                | 0               | S                | 0           | S                |                                                  | S                | 99               | <i>blaOXA</i> | Inactive     | S                | 0           | 99               | 0          | 0                                      | Wild Type*         | TGTAATAAATATTACA         | 0                                    |
| CAM001627   | S                | <i>gyrA</i> Thr186Ile | S                | S                | 0               | R                | <i>tetO</i> | S                | <i>sat4; ant6la; aad6; aph3lla</i>               | S                | 99               | <i>blaOXA</i> | Active       | S                | 0           | 99               | 0          | 1                                      | RE-cmeABC          | TGTAATAAATATTACA         | 0                                    |
| CAM001666   | S                | <i>gyrA</i> Thr186Ile | S                | S                | 23S rRNA A2075G | S                | <i>tetO</i> | S                | <i>sat4; ant6la; aad6; aph3lla; aad9; aph2lf</i> | S                | 99               | <i>blaOXA</i> | Active       | S                | 0           | 99               | 0          | 0                                      | Wild Type          | TGTAATAAATATTACA         | 0                                    |
| CAM001698   | S                | <i>gyrA</i> Thr186Ile | S                | I                | 23S rRNA A2075G | R                | <i>tetO</i> | S                | <i>sat4; ant6la; aad6; aph3lla</i>               | R                | 99               | <i>blaOXA</i> | Active       | S                | 0           | 99               | 0          | 3                                      | Wild Type          | TGTAATAAATATTACA         | 0                                    |
| CAM001710   | S                | <i>gyrA</i> Thr186Ile | S                | S                | 23S rRNA A2075G | I                | 0           | S                |                                                  | R                | 99               | <i>blaOXA</i> | Inactive     | S                | 0           | 99               | 0          | 2                                      | Wild Type*         | TGTAATAAATATTACA         | 0                                    |
| CAM001748   | R                | <i>gyrA</i> Thr186Ile | S                | S                | 23S rRNA A2075G | R                | <i>tetO</i> | S                | <i>sat4; ant6la; aad6; aph3lla</i>               | S                | 99               | <i>blaOXA</i> | Active       | S                | 0           | 99               | 0          | 2                                      | RE-cmeABC          | No CmeR binding site     | 1                                    |
| CAM002101   | R                | <i>gyrA</i> Thr186Ile | R                | S                | 23S rRNA A2075G | R                | <i>tetO</i> | I                | <i>rpsL K43R; aph3lla; aad9; aph2lf</i>          | S                | 99               | <i>blaOXA</i> | Active       | S                | 0           | 99               | 0          | 4                                      | RE-cmeABC          | TGTAATAAATATTACA         | 0                                    |
| CAM002734   | R                | 0                     | S                | S                | 0               | R                | 0           | S                |                                                  | S                | 99               | <i>blaOXA</i> | Inactive     | S                | 0           | 99               | 0          | 2                                      | Wild Type          | TGCAATAAATATTACA         | 0                                    |
| PE1002465   | S                | 0                     | S                | S                | 0               | R                | 0           | S                |                                                  | S                | R                | 0             | NA           | 99               | 0           | S                | 0          | 2                                      | Wild Type          | TGTAATAAATATTACA         | 0                                    |
| PE1002984   | R                | <i>gyrA</i> Thr186Ile | S                | S                | 0               | S                | 0           | S                |                                                  | S                | S                | <i>blaOXA</i> | Inactive     | 99               | 0           | S                | 0          | 1                                      | Wild Type          | TGCAATAAATATTACA         | 0                                    |
| PE1003845   | S                | 0                     | S                | S                | 0               | S                | 0           | S                |                                                  | S                | S                | 0             | NA           | 99               | 0           | S                | 0          | 0                                      | Wild Type          | TGTAATAAATATTACA         | 0                                    |
| PE1004094   | R                | <i>gyrA</i> Thr186Ile | R                | R                | 23S rRNA A2075G | R                | <i>tetO</i> | R                | <i>rpsL K43R; aph3lla</i>                        | S                | R                | <i>blaOXA</i> | Undetermined | 99               | 0           | S                | 0          | 5                                      | Wild Type          | nd                       | 0                                    |
| PE1004747   | R                | <i>gyrA</i> Thr186Ile | S                | S                | 0               | S                | 0           | S                |                                                  | S                | R                | <i>blaOXA</i> | Active       | 99               | 0           | S                | 0          | 2                                      | RE-cmeABC          | TGCAATAAATATTACA         | 0                                    |
| PE1006339   | S                | 0                     | S                | S                | 0               | S                | 0           | S                |                                                  | S                | S                | 0             | NA           | 99               | 0           | S                | 0          | 0                                      | Wild Type          | TGTAATAAATATTACA         | 0                                    |
| PE1006365   | R                | <i>gyrA</i> Thr186Ile | R                | R                | 23S rRNA A2075G | R                | <i>tetO</i> | R                | <i>rpsL K43R; aph3lla</i>                        | S                | R                | <i>blaOXA</i> | Active       | 99               | 0           | S                | 0          | 5                                      | Wild Type          | TGCAATAAATATTACA         | 0                                    |
| PE1006426   | R                | <i>gyrA</i> Thr186Ile | S                | S                | 0               | S                | 0           | S                |                                                  | S                | S                | <i>blaOXA</i> | Inactive     | 99               | 0           | S                | 0          | 1                                      | Wild Type          | TGTAATAAATATTACA         | 0                                    |
| PE1006490   | S                | 0                     | S                | S                | 0               | S                | 0           | S                |                                                  | S                | S                | <i>blaOXA</i> | Inactive     | 99               | 0           | S                | 0          | 0                                      | Wild Type          | TGTAATAAATATTGCA         | 1                                    |
| PE1006723   | R                | <i>gyrA</i> Thr186Ile | R                | R                | 23S rRNA A2075G | R                | <i>tetO</i> | R                | <i>rpsL K43R; aph3lla</i>                        | S                | R                | <i>blaOXA</i> | Active       | 99               | 0           | S                | 0          | 5                                      | Wild Type          | No CmeR binding site     | 1                                    |
| PE1006864   | R                | <i>gyrA</i> Thr186Ile | R                | R                | 23S rRNA A2075G | R                | <i>tetO</i> | R                | <i>rpsL K43R; aph3lla</i>                        | I                | R                | <i>blaOXA</i> | Active       | 99               | 0           | S                | 0          | 5                                      | Wild Type          | No CmeR binding site     | 1                                    |
| PE1007082   | R                | <i>gyrA</i> Thr186Ile | R                | R                | 23S rRNA A2075G | R                | <i>tetO</i> | R                | <i>rpsL K43R; aph3lla</i>                        | S                | R                | <i>blaOXA</i> | Active       | 99               | 0           | S                | 0          | 5                                      | Wild Type          | TGCAATAAATATTACA         | 0                                    |
| PE1007356   | R                | <i>gyrA</i> Thr186Ile | S                | S                | 0               | S                | 0           | S                |                                                  | S                | S                | 0             | NA           | 99               | 0           | S                | 0          | 1                                      | Wild Type          | TGTAATAAATATTACA         | 0                                    |
| PE1007381   | R                | <i>gyrA</i> Thr186Ile | S                | S                | 0               | R                | <i>tetO</i> | S                |                                                  | I                | R                | <i>blaOXA</i> | Active       | 99               | 0           | S                | 0          | 3                                      | Wild Type          | TGCAATAAATATTACA         | 0                                    |
| PE1007449   | R                | <i>gyrA</i> Thr186Ile | R                | R                | 23S rRNA A2075G | R                | <i>tetO</i> | R                | <i>rpsL K43R; aph3lla</i>                        | I                | R                | <i>blaOXA</i> | Active       | 99               | 0           | S                | 0          | 5                                      | Wild Type          | No CmeR binding site     | 1                                    |
| PE1007476   | R                | <i>gyrA</i> Thr186Ile | R                | R                | 23S rRNA A2075G | R                | <i>tetO</i> | R                | <i>rpsL K43R; aph3lla</i>                        | I                | R                | <i>blaOXA</i> | Active       | 99               | 0           | S                | 0          | 5                                      | Wild Type          | No CmeR binding site     | 1                                    |
| PE1007691   | R                | <i>gyrA</i> Thr186Ile | R                | R                | 23S rRNA A2075G | R                | <i>tetO</i> | R                | <i>rpsL K43R; aph3lla</i>                        | S                | R                | <i>blaOXA</i> | Undetermined | 99               | 0           | S                | 0          | 5                                      | RE-cmeABC          | No CmeR binding site     | 1                                    |
| PE1007966   | R                | <i>gyrA</i> Thr186Ile | R                | R                | 23S rRNA A2075G | R                | <i>tetO</i> | R                | <i>rpsL K43R; aph3lla</i>                        | S                | I                | <i>blaOXA</i> | Active       | 99               | 0           | S                | 0          | 5                                      | Wild Type          | TGCAATAAATATTACA         | 0                                    |
| PE1008355   | R                | <i>gyrA</i> Thr186Ile | R                | R                | 23S rRNA A2075G | R                | <i>tetO</i> | R                | <i>rpsL K43R; aph3lla</i>                        | S                | R                | <i>blaOXA</i> | Undetermined | 99               | 0           | S                | 0          | 5                                      | Wild Type          | TGCAATAAATATTACA         | 0                                    |
| PE1008376   | R                | <i>gyrA</i> Thr186Ile | R                | R                | 0               | R                | <i>tetO</i> | S                |                                                  | S                | R                | <i>blaOXA</i> | Active       | 99               | 0           | S                | 0          | 4                                      | Wild Type          | No CmeR binding site     | 1                                    |
| PE1008428   | R                | <i>gyrA</i> Thr186Ile | R                | R                | 0               | R                | <i>tetO</i> | S                |                                                  | S                | R                | <i>blaOXA</i> | Inactive     | 99               | 0           | S                | 0          | 4                                      | Wild Type          | No CmeR binding site     | 1                                    |
| PE1008575   | R                | <i>gyrA</i> Thr186Ile | R                | R                | 23S rRNA A2075G | R                | <i>tetO</i> | R                | <i>rpsL K43R; aph3lla</i>                        | S                | R                | <i>blaOXA</i> | Active       | 99               | 0           | S                | 0          | 5                                      | RE-cmeABC          | TGCAATAAATATTACA         | 0                                    |
| PE1008592   | R                | <i>gyrA</i> Thr186Ile | R                | R                | 23S rRNA A2075G | R                | <i>tetO</i> | R                | <i>rpsL K43R; aph3lla</i>                        | S                | R                | <i>blaOXA</i> | Active       | 99               | 0           | S                | 0          | 5                                      | Wild Type          | TGCAATAAATATTACA         | 0                                    |
| PE1008668   | R                | 0                     | S                | S                | 0               | S                | 0           | S                |                                                  | S                | I                | <i>blaOXA</i> | Inactive     | 99               | 0           | S                | 0          | 2                                      | Wild Type          | TGTAATAAATATTACA         | 0                                    |
| PE1008723   | R                | <i>gyrA</i> Thr186Ile | S                | S                | 0               | S                | 0           | S                |                                                  | S                | S                | 0             | NA           | 99               | 0           | S                | 0          | 1                                      | Wild Type          | TGTAATAAATATTACA         | 0                                    |
| PE1008776   | R                | <i>gyrA</i> Thr186Ile | R                | R                | 23S rRNA A2075G | R                | <i>tetO</i> | R                | <i>rpsL K43R; aph3lla</i>                        | S                | R                | <i>blaOXA</i> | Active       | 99               | 0           | S                | 0          | 5                                      | Wild Type          | No CmeR binding site     | 1                                    |
| PE1008805   | R                | <i>gyrA</i> Thr186Ile | S                | S                | 0               | S                | 0           | S                |                                                  | S                | S                | <i>blaOXA</i> | Inactive     | 99               | 0           | S                | 0          | 1                                      | Wild Type          | TGTAATAAATATTACA         | 0                                    |
| PE1008831   | R                | <i>gyrA</i> Thr186Ile | S                | S                | 0               | R                | <i>tetO</i> | S                |                                                  | S                | S                | <i>blaOXA</i> | Inactive     | 99               | 0           | S                | 0          | 2                                      | Wild Type          | TGTAATAAATATTACA         | 0                                    |
| PE1008862   | R                | <i>gyrA</i> Thr186Ile | R                | R                | 23S rRNA A2075G | R                | <i>tetO</i> | R                | <i>rpsL K43R; aph3lla</i>                        | S                | R                | <i>blaOXA</i> | Undetermined | 99               | 0           | S                | 0          | 5                                      | RE-cmeABC          | TGTAATAAATATTGCA         | 1                                    |
| PE1008890   | R                | <i>gyrA</i> Thr186Ile | S                | S                | 0               | R                | <i>tetO</i> | S                |                                                  | S                | I                | <i>blaOXA</i> | Inactive     | 99               | 0           | S                | 0          | 3                                      | Wild Type          | TGTAATAAATATTACA         | 0                                    |
| PE1008972   | R                | <i>gyrA</i> Thr186Ile | R                | R                | 23S rRNA A2075G | R                | <i>tetO</i> | R                | <i>rpsL K43R; aph3lla</i>                        | S                | R                | <i>blaOXA</i> | Inactive     | 99               | 0           | S                | 0          | 5                                      | RE-cmeABC          | nd                       | 0                                    |
| PE1009079   | R                | <i>gyrA</i> Thr186Ile | S                | S                | 0               | R                | <i>tetO</i> | S                |                                                  | I                | R                | <i>blaOXA</i> | Active       | 99               | 0           | S                | 0          | 3                                      | Wild Type          | TGCAATAAATATTACA         | 0                                    |
| PE1009156   | R                | <i>gyrA</i> Thr186Ile | R                | R                | 23S rRNA A2075G | R                | <i>tetO</i> | R                | <i>aph3lla</i>                                   | S                | R                | <i>blaOXA</i> | Active       | 99               | 0           | S                | 0          | 5                                      | Wild Type          | TGCAATAAATATTACA         | 0                                    |
| PE1009159   | S                | 0                     | S                | S                | 0               | S                | 0           | S                |                                                  | S                | S                | 0             | NA           | 99               | 0           | S                | 0          | 0                                      | Wild Type          | TGTAATAAATATTACA         | 0                                    |
| PE1009160   | S                | 0                     | S                | S                | 0               | S                | 0           | S                |                                                  | S                | S                | <i>blaOXA</i> | Inactive     | 99               | 0           | S                | 0          | 0                                      | Wild Type          | TGTAATAAATATTACA         | 0                                    |
| PE1009428   | R                | <i>gyrA</i> Thr186Ile | R                | R                | 23S rRNA A2075G | R                | <i>tetO</i> | S                |                                                  | S                | R                | <i>blaOXA</i> | Active       | 99               | 0           | S                | 0          | 4                                      | Wild Type          | TGCAATAAATATTACA         | 0                                    |
| PE1009439   | R                | <i>gyrA</i> Thr186Ile | R                | R                | 23S rRNA A2075G | R                | <i>tetO</i> | R                | <i>rpsL K43R; aph3lla</i>                        | S                | R                | <i>blaOXA</i> | Active       | 99               | 0           | S                | 0          | 5                                      | Wild Type          | TGCAATAAATATTACA         | 0                                    |
| PE1009684   | R                | <i>gyrA</i> Thr186Ile | R                | R                | 23S rRNA A2075G | R                | <i>tetO</i> | R                | <i>aph3lla</i>                                   | S                | R                | <i>blaOXA</i> | Active       | 99               | 0           | S                | 0          | 5                                      | Wild Type          | TGCAATAAATATTACA         | 0                                    |
| PE1009978   | R                | <i>gyrA</i> Thr186Ile | R                | R                | 23S rRNA A2075G | R                | <i>tetO</i> | R                | <i>rpsL K43R; aph3lla</i>                        | S                | R                | <i>blaOXA</i> | Active       | 99               | 0           | S                | 0          | 5                                      | Wild Type          | TGCAATAAATATTACA         | 0                                    |
| PE1010102   | R                | <i>gyrA</i> Thr186Ile | R                | R                | 23S rRNA A2075G | R                | <i>tetO</i> | S                |                                                  | S                | R                | <i>blaOXA</i> | Active       | 99               | 0           | S                | 0          | 4                                      | RE-cmeABC          | TGTAATAAATATTGCA         | 1                                    |
| PE1010256   | R                | <i>gyrA</i> Thr186Ile | S                | S                | 0               | S                | 0           | S                |                                                  | S                | R                | <i>blaOXA</i> | Active       | 99               | 0           | S                | 0          | 2                                      | Wild Type          | TGCAATAAATATTACA         | 0                                    |
| PE1011000   | R                | <i>gyrA</i> Thr186Ile | R                | R                | 23S rRNA A2075G | R                | <i>tetO</i> | R                | <i>rpsL K43R; aph3lla</i>                        | I                | R                | <i>blaOXA</i> | Active       | 99               | 0           | S                | 0          | 5                                      | Wild Type          | No CmeR binding site     | 1                                    |
| PE1011016   | R                | <i>gyrA</i> Thr186Ile | R                | R                | 23S rRNA A2075G | R                | <i>tetO</i> | R                | <i>rpsL K43R; aph3lla</i>                        | S                | R                | <i>blaOXA</i> | Active       | 99               | 0           | S                | 0          | 5                                      | RE-cmeABC          | TGCAATAAATATTACA         | 0                                    |
| PE1011046   | R                | <i>gyrA</i> Thr186Ile | S                | S                | 0               | S                | 0           | S                |                                                  | S                | S                | <i>blaOXA</i> | Inactive     | 99               | 0           | S                | 0          | 1                                      | Wild Type          | TGTAATAAATATTACA         | 0                                    |
| PE1011852   | R                | <i>gyrA</i> Thr186Ile | S                | S                | 0               | R                | <i>tetO</i> | S                |                                                  | S                | S                | <i>blaOXA</i> | Inactive     | 99               | 0           | S                | 0          | 2                                      | Wild Type          | TGTAATAAATATTACA         | 0                                    |
| PE1011946   | S                | 0                     | S                | S                | 0               | S                | 0           | S                |                                                  | S                | S                | 0             | NA           | 99               | 0           | S                | 0          | 0                                      | Wild Type          | TGTAATAAATATTACA         | 0                                    |
| PE1012031   | S                | 0                     | S                | S                | 0               | S                | 0           | S                |                                                  | S                | S                | 0             | NA           | 99               | 0           | S                | 0          | 0                                      | Wild Type          | TGTAATAAATATTACA         | 0                                    |
| PE1012319   | R                | <i>gyrA</i> Thr186Ile | S                | S                | 0               | S                | 0           | S                |                                                  | S                | S                | <i>blaOXA</i> | Inactive     | 99               | 0           | S                | 0          | 1                                      | Wild Type          | TGCAATAAATATTACA         | 0                                    |
| PE1012321   | R                | <i>gyrA</i> Thr186Ile | S                | S                | 0               | S                | 0           | S                |                                                  | S                | S                | <i>blaOXA</i> | Inactive     | 99               | 0           | S                | 0          | 1                                      | Wild Type          | TGCAATAAATATTACA         | 0                                    |
| PE1012587   | R                | <i>gyrA</i> Thr186Ile | R                | R                | 23S rRNA A2075G | R                | <i>tetO</i> | R                | <i>aph3lla</i>                                   | S                | R                | <i>blaOXA</i> | Active       | 99               | 0           | S                | 0          | 5                                      | Wild Type          | TGCAATAAATATTACA         | 0                                    |
| PE1012753   | R                | <i>gyrA</i> Thr186Ile | S                | S                | 0               | S                | 0           | S                |                                                  | S                | R                | <i>blaOXA</i> | Active       | 99               | 0           | S                | 0          | 2                                      | Wild Type          | TGCAATAAATATTACA         | 0                                    |
| PE1013325   | R                | <i>gyrA</i> Thr186Ile | S                | S                | 0               | R                | <i>tetO</i> | S                |                                                  | S                | I                | <i>blaOXA</i> | Inactive     | 99               | 0           | S                | 0          | 3                                      | Wild Type          | TGCAATAAATATTACA         | 0                                    |
| PE1014576   | R                | <i>gyrA</i> Thr186Ile | R                | R                | 23S rRNA A2075G | R                | <i>tetO</i> | S                | <i>rpsL K43R</i>                                 | S                | R                | <i>blaOXA</i> | Active       | 99               | 0           | S                | 0          | 4                                      | RE-cmeABC          | TG                       |                                      |



**Supplementary Table 3A:** Internal validity parameters of antimicrobial susceptibility and specific AMR determinants of clinical *Campylobacter jejuni* and *Campylobacter coli* isolates.

| Antimicrobial              | AMR Determinant                     | <i>Campylobacter jejuni</i> |       |       |       |       | <i>Campylobacter coli</i> |       |       |       |       |
|----------------------------|-------------------------------------|-----------------------------|-------|-------|-------|-------|---------------------------|-------|-------|-------|-------|
|                            |                                     | ACC                         | SN    | SP    | PPV   | NPV   | ACC                       | SN    | SP    | PPV   | NPV   |
| Ciprofloxacin              | Thr86Ile <i>gyrA</i> point mutation | 78.4%                       | 75.0% | 86.2% | 92.7% | 59.5% | 88.1%                     | 96.2% | 60.0% | 89.3% | 81.8% |
| Azithromycin/ Erythromycin | A2075G 23SrRNA point mutation       | 87.6%                       | 31.3% | 98.8% | 83.3% | 87.9% | 86.6%                     | 90.0% | 83.8% | 82%   | 91.2% |
| Gentamicin                 | Aminoglycoside resistance genes*    | 79.4%                       | 70.0% | 80.5% | 29.2% | 95.9% | 88.1%                     | 100%  | 81.0% | 75.8% | 100%  |
| Ampicillin                 | <i>bla-OXA</i> genes**              | 71.9%                       | 66.7% | 56.8% | 69.0% | 75.0% | 79.2%                     | 83.3% | 33.3% | 77.8% | 87.5% |
| Tetracycline               | <i>tet(O)</i> gene                  | 81.4%                       | 76.0% | 87.2% | 86.4% | 77.4% | 91.0%                     | 93.2% | 87.0% | 93.2% | 87.0% |

ACC = Accuracy; SN = Sensitivity; SP = Specificity; PPV = Positive Predictive Value; NPV = Negative Predictive Value

\*For *C. jejuni* and *C. coli* includes: *rpsL* K43R, *APH3IIIa*, *ant6la*, *aad9*, *aad6*, *APH2If*, *SAT4*.

\*\* For *C. jejuni* and *C. coli* includes genes in *bla-OXA 61* and *bla-OXA 184* family. Other mutations in the *gyrA* gene (Asp90Asn, Thr86Lys, Thr86Val, Thr86Ala and Asp90Tyr substitutions, and double mutations Thr86Ile-Pro104Ser and Thr86Ile-Asp90Asn), 23S rRNA genes (A2074G, A2075C), mutations in L4 and L22 ribosomal proteins, and *ermB* resistance gene were not found.

**Supplementary Table 3B: Internal validity metrics of genes and point mutations among *C. jejuni* and *C. coli* samples.**

*Campylobacter jejuni*

|                             |   | Quinolones Phenotype |    |    |
|-----------------------------|---|----------------------|----|----|
|                             |   | 1                    | 0  |    |
| <b>Thr86Ile <i>gyrA</i></b> | 1 | 51                   | 4  | 55 |
|                             | 0 | 17                   | 25 | 42 |
|                             |   | 68                   | 29 | 97 |

|     |       |
|-----|-------|
| SN  | 75.0% |
| SP  | 86.2% |
| ACC | 78.4% |
| PPV | 92.7% |
| NPV | 59.5% |

|                            |   | Macrolides Phenotype |    |    |
|----------------------------|---|----------------------|----|----|
|                            |   | 1                    | 0  |    |
| <b>A2075G 23S<br/>rRNA</b> | 1 | 5                    | 1  | 6  |
|                            | 0 | 11                   | 80 | 91 |
|                            |   | 16                   | 81 | 97 |

|     |       |
|-----|-------|
| SN  | 31.3% |
| SP  | 98.8% |
| ACC | 87.6% |
| PPV | 83%   |
| NPV | 87.9% |

|                                 |   | Gentamicin Phenotype |    |    |
|---------------------------------|---|----------------------|----|----|
|                                 |   | 1                    | 0  |    |
| <b>Aminoglycoside<br/>genes</b> | 1 | 7                    | 17 | 24 |
|                                 | 0 | 3                    | 70 | 73 |
|                                 |   | 10                   | 87 | 97 |

|     |       |
|-----|-------|
| SN  | 70.0% |
| SP  | 80.5% |
| ACC | 79.4% |
| PPV | 29.2% |
| NPV | 95.9% |

|                      |   | Ampicillin Phenotype |    |    |
|----------------------|---|----------------------|----|----|
|                      |   | 1                    | 0  |    |
| <b><i>blaOXA</i></b> | 1 | 20                   | 9  | 29 |
|                      | 0 | 7                    | 21 | 28 |
|                      |   | 30                   | 37 | 57 |

|     |       |
|-----|-------|
| SN  | 66.7% |
| SP  | 56.8% |
| ACC | 71.9% |
| PPV | 69.0% |
| NPV | 75.0% |

|                    |   | Tetracycline Phenotype |    |    |
|--------------------|---|------------------------|----|----|
|                    |   | 1                      | 0  |    |
| <b><i>tetO</i></b> | 1 | 38                     | 6  | 44 |
|                    | 0 | 12                     | 41 | 53 |
|                    |   | 50                     | 47 | 97 |

|     |       |
|-----|-------|
| SN  | 76.0% |
| SP  | 87.2% |
| ACC | 81.4% |
| PPV | 86.4% |
| NPV | 77.4% |

*Campylobacter coli*

|                      |   | Quinolones Phenotype |    |    |
|----------------------|---|----------------------|----|----|
|                      |   | 1                    | 0  |    |
| <b>Thr86Ile gyrA</b> | 1 | 50                   | 6  | 56 |
|                      | 0 | 2                    | 9  | 11 |
|                      |   | 52                   | 15 | 67 |

|     |       |
|-----|-------|
| SN  | 96.2% |
| SP  | 60.0% |
| ACC | 88.1% |
| PPV | 89.3% |
| NPV | 81.8% |

|                        |   | Macrolides Phenotype |    |    |
|------------------------|---|----------------------|----|----|
|                        |   | 1                    | 0  |    |
| <b>A2075G 23S rRNA</b> | 1 | 27                   | 6  | 33 |
|                        | 0 | 3                    | 31 | 34 |
|                        |   | 30                   | 37 | 67 |

|     |       |
|-----|-------|
| SN  | 90.0% |
| SP  | 83.8% |
| ACC | 86.6% |
| PPV | 82%   |
| NPV | 91.2% |

|                             |   | Gentamicin Phenotype |    |    |
|-----------------------------|---|----------------------|----|----|
|                             |   | 1                    | 0  |    |
| <b>Aminoglycoside genes</b> | 1 | 25                   | 8  | 33 |
|                             | 0 | 0                    | 34 | 34 |
|                             |   | 25                   | 42 | 67 |

|     |        |
|-----|--------|
| SN  | 100.0% |
| SP  | 81.0%  |
| ACC | 88.1%  |
| PPV | 75.8%  |
| NPV | 100%   |

|               |   | Ampicillin Phenotype |    |    |
|---------------|---|----------------------|----|----|
|               |   | 1                    | 0  |    |
| <b>blaOXA</b> | 1 | 35                   | 10 | 45 |
|               | 0 | 1                    | 7  | 8  |
|               |   | 42                   | 21 | 53 |

|     |       |
|-----|-------|
| SN  | 83.3% |
| SP  | 33.3% |
| ACC | 79.2% |
| PPV | 77.8% |
| NPV | 87.5% |

|             |   | Tetracycline Phenotype |    |    |
|-------------|---|------------------------|----|----|
|             |   | 1                      | 0  |    |
| <b>tetO</b> | 1 | 41                     | 3  | 44 |
|             | 0 | 3                      | 20 | 23 |
|             |   | 44                     | 23 | 67 |

|     |       |
|-----|-------|
| SN  | 93.2% |
| SP  | 87.0% |
| ACC | 91.0% |
| PPV | 93.2% |
| NPV | 87.0% |

Supplementary Figure 1. Phylogenetic tree showing similarity of *blaOXA* genes

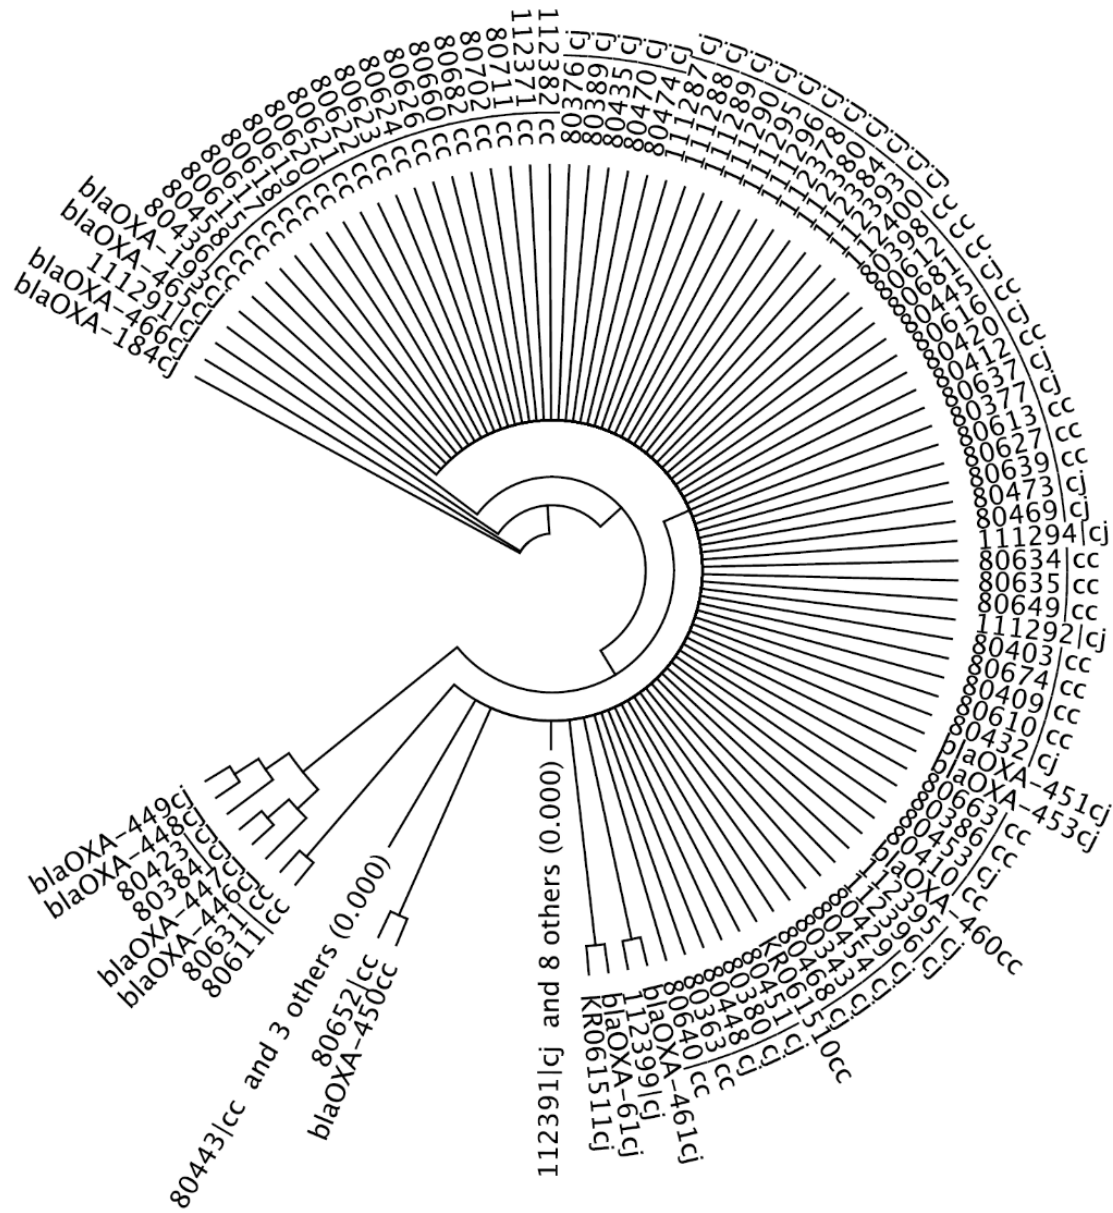

Supplement: NIHMS1991160-supplement-Supplementary_Material.pdf [file NIHMS1991160-supplement-Supplementary_Material.pdf]
